# Supplementary material for: Multilocus Phylogeography and Species Delimitation in the Cumberland Plateau Salamander, Plethodon kentucki: Incongruence among Data Sets and Methods
Source: PubMed Central journal article supplement (PMC4790894; doi:10.1371/journal.pone.0150022), 2016-03-14
Supplement: pone.0150022.s001.pdf [file pone.0150022.s001.pdf]

**Table A.** Sampling information. Population numbers correspond to Figure 1 and are used throughout the text. The "Complete" data set has no missing data for any locus (see text), and is identified using check marks. MtDNA haplotypes were uploaded to GenBank as an alignment; check marks identify the loci included for each individual. All specimens are *Plethodon kentucki*, except for the last four specimens, which are *Plethodon glutinosus* and were used as outgroups some analyses.

| Pop | Specimen | Locality                          | County    | State | Latitude | Longitude | Complete | mtDNA    | CytB | ND2 | tRNA-trp | tRNA-ala | BFI      | GAPD     | MLC2A    | ILF3     | RAG-1    |
|-----|----------|-----------------------------------|-----------|-------|----------|-----------|----------|----------|------|-----|----------|----------|----------|----------|----------|----------|----------|
| 1   | SRK3022  | Point Pleasant                    | Mason     | WV    | 38.8196  | -82.1611  | -        | KU840930 | ✓    | ✓   | ✓        | ✓        | KU841067 | KU841144 | KU841294 | -        | -        |
| 1   | SRK3023  | Point Pleasant                    | Mason     | WV    | 38.8196  | -82.1611  | -        | KU840931 | ✓    | ✓   | ✓        | ✓        | KU841068 | KU841145 | KU841295 | -        | -        |
| 2   | RH65589  | Henderson                         | Mason     | WV    | 38.8219  | -82.1558  | ✓        | KU840999 | ✓    | ✓   | ✓        | ✓        | KU841110 | KU841186 | KU841333 | KU841247 | KU841409 |
| 2   | RH65590  | Henderson                         | Mason     | WV    | 38.8219  | -82.1558  | ✓        | KU841000 | ✓    | ✓   | ✓        | ✓        | KU841111 | KU841187 | KU841334 | KU841256 | KU841410 |
| 2   | RH65591  | Henderson                         | Mason     | WV    | 38.8219  | -82.1558  | -        | KU841001 | ✓    | -   | -        | -        | -        | -        | KU841335 | -        | -        |
| 3   | RH65666  | Union Ridge Road                  | Cabell    | WV    | 38.5772  | -82.2275  | ✓        | KU841002 | ✓    | ✓   | ✓        | ✓        | KU841112 | KU841188 | KU841336 | KU841266 | KU841411 |
| 3   | RH65667  | Union Ridge Road                  | Cabell    | WV    | 38.5772  | -82.2275  | ✓        | KU841003 | ✓    | ✓   | ✓        | ✓        | KU841113 | KU841189 | KU841337 | KU841261 | KU841412 |
| 3   | RH65668  | Union Ridge Road                  | Cabell    | WV    | 38.5772  | -82.2275  | -        | KU841004 | ✓    | -   | -        | -        | -        | -        | KU841338 | -        | -        |
| 4   | RH53378  | Huntington                        | Cabell    | WV    | 38.4019  | -82.4367  | ✓        | KU840956 | ✓    | ✓   | ✓        | ✓        | KU841080 | KU841156 | KU841305 | KU841222 | KU841379 |
| 4   | RH53379  | Huntington                        | Cabell    | WV    | 38.4019  | -82.4367  | ✓        | KU840957 | ✓    | ✓   | ✓        | ✓        | KU841081 | KU841157 | KU841306 | KU841270 | KU841380 |
| 5   | RH52628  | 3.5 km SSW of Virgie              | Pike      | KY    | 37.3064  | -82.5972  | ✓        | KU840938 | ✓    | ✓   | ✓        | ✓        | KU841072 | KU841149 | KU841299 | KU841264 | KU841372 |
| 5   | RH52629  | 3.5 km SSW of Virgie              | Pike      | KY    | 37.3064  | -82.5972  | ✓        | KU840939 | ✓    | ✓   | ✓        | ✓        | KU841073 | KU841150 | KU841300 | KU841263 | KU841373 |
| 5   | RH52631  | 3.5 km SSW of Virgie              | Pike      | KY    | 37.3064  | -82.5972  | -        | KU840940 | ✓    | -   | -        | -        | -        | -        | -        | -        | -        |
| 5   | RH52632  | 3.5 km SSW of Virgie              | Pike      | KY    | 37.3064  | -82.5972  | -        | KU840941 | ✓    | -   | -        | -        | -        | -        | -        | -        | -        |
| 5   | RH54238  | 3.5 km SSW of Virgie              | Pike      | KY    | 37.3064  | -82.5972  | -        | KU840962 | ✓    | -   | -        | -        | -        | -        | -        | -        | -        |
| 6   | RH79575  | North Fork Road                   | Wise      | VA    | 37.0817  | -82.7036  | ✓        | KU841060 | ✓    | ✓   | ✓        | ✓        | KU841141 | KU841217 | KU841364 | KU841225 | KU841438 |
| 7   | RH53307  | 1.5 km NE of Pound Gap            | Letcher   | KY    | 37.1658  | -82.6250  | ✓        | KU840953 | ✓    | ✓   | ✓        | ✓        | KU841078 | KU841155 | KU841304 | KU841244 | KU841378 |
| 7   | RH53308  | 1.5 km NE of Pound Gap            | Letcher   | KY    | 37.1658  | -82.6250  | -        | KU840954 | ✓    | -   | -        | -        | KU841079 | -        | -        | -        | -        |
| 7   | RH53309  | 1.5 km NE of Pound Gap            | Letcher   | KY    | 37.1658  | -82.6250  | -        | KU840955 | ✓    | -   | -        | -        | -        | -        | -        | -        | -        |
| 7   | RH54812  | 1.5 km NE of Pound Gap            | Letcher   | KY    | 37.1658  | -82.6250  | ✓        | KU840963 | ✓    | ✓   | ✓        | ✓        | KU841085 | KU841161 | KU841308 | KU841274 | KU841384 |
| 7   | RH54813  | 1.5 km NE of Pound Gap            | Letcher   | KY    | 37.1658  | -82.6250  | -        | KU840964 | ✓    | ✓   | -        | -        | -        | -        | -        | -        | -        |
| 8   | RH55951  | Pound Mountain Tower              | Wise      | VA    | 37.1528  | -82.6428  | ✓        | KU840967 | ✓    | ✓   | ✓        | ✓        | KU841088 | KU841164 | KU841311 | KU841268 | KU841387 |
| 9   | RH78206  | Pound Gap                         | Letcher   | KY    | 37.1553  | -82.6336  | ✓        | KU841048 | ✓    | ✓   | ✓        | ✓        | KU841135 | KU841210 | KU841359 | KU841254 | KU841432 |
| 9   | RH78479  | Pound Gap                         | Letcher   | KY    | 37.1553  | -82.6336  | ✓        | KU841056 | ✓    | ✓   | ✓        | -        | KU841140 | KU841215 | KU841363 | KU841259 | KU841437 |
| 10  | RH60245  | Oscalosa                          | Letcher   | KY    | 37.0967  | -82.8908  | ✓        | KU840981 | ✓    | ✓   | ✓        | ✓        | KU841097 | KU841173 | KU841320 | KU841221 | KU841396 |
| 10  | RH60246  | Oscalosa                          | Letcher   | KY    | 37.0967  | -82.8908  | ✓        | KU840982 | ✓    | ✓   | ✓        | ✓        | KU841098 | KU841174 | KU841321 | KU841223 | KU841397 |
| 11  | RH77587  | 3 miles E Scuttlehole Gap         | Letcher   | KY    | 37.0667  | -82.8250  | ✓        | KU841023 | ✓    | ✓   | ✓        | ✓        | KU841124 | KU841199 | KU841347 | KU841235 | KU841421 |
| 11  | RH77588  | 3 miles E Scuttlehole Gap         | Letcher   | KY    | 37.0667  | -82.8250  | ✓        | KU841024 | ✓    | ✓   | ✓        | ✓        | KU841125 | KU841200 | KU841348 | KU841265 | KU841422 |
| 11  | RH77589  | 3 miles E Scuttlehole Gap         | Letcher   | KY    | 37.0667  | -82.8250  | -        | KU841025 | ✓    | ✓   | -        | -        | -        | -        | -        | -        | -        |
| 11  | RH78157  | 4 miles E Scuttlehole Gap         | Letcher   | KY    | 37.0667  | -82.8250  | -        | KU841038 | ✓    | -   | -        | -        | -        | -        | KU841355 | -        | -        |
| 11  | RH78158  | 5 miles E Scuttlehole Gap         | Letcher   | KY    | 37.0667  | -82.8250  | -        | KU841039 | ✓    | -   | -        | -        | -        | -        | -        | -        | -        |
| 12  | RH77616  | Scuttlehole Gap                   | Letcher   | KY    | 37.0536  | -82.8575  | ✓        | KU841036 | ✓    | ✓   | ✓        | ✓        | KU841130 | KU841205 | KU841353 | KU841224 | KU841427 |
| 12  | RH77617  | Scuttlehole Gap                   | Letcher   | KY    | 37.0536  | -82.8575  | ✓        | KU841037 | ✓    | ✓   | ✓        | ✓        | KU841131 | KU841206 | KU841354 | KU841236 | KU841428 |
| 12  | RH78481  | Scuttlehole Gap                   | Letcher   | KY    | 37.0536  | -82.8575  | -        | KU841057 | ✓    | -   | -        | -        | -        | -        | -        | -        | -        |
| 13  | RH78215  | Near Flat Gap                     | Dickenson | VA    | 37.2333  | -82.4658  | ✓        | KU841049 | ✓    | ✓   | ✓        | ✓        | KU841136 | KU841211 | KU841360 | KU841283 | KU841433 |
| 13  | RH78216  | Near Flat Gap                     | Dickenson | VA    | 37.2333  | -82.4658  | ✓        | KU841050 | ✓    | ✓   | ✓        | ✓        | KU841137 | KU841212 | KU841361 | KU841285 | KU841434 |
| 13  | RH78490  | Near Flat Gap                     | Dickenson | VA    | 37.2333  | -82.4658  | -        | KU841058 | ✓    | -   | -        | -        | -        | KU841216 | -        | -        | -        |
| 13  | RH78491  | Near Flat Gap                     | Dickenson | VA    | 37.2333  | -82.4658  | -        | KU841059 | ✓    | -   | -        | -        | -        | -        | -        | -        | -        |
| 14  | RH77591  | West Garrett                      | Floyd     | KY    | 37.4833  | -82.8311  | ✓        | KU841026 | ✓    | ✓   | ✓        | ✓        | KU841126 | KU841201 | KU841349 | KU841231 | KU841423 |
| 14  | RH77592  | West Garrett                      | Floyd     | KY    | 37.4833  | -82.8311  | -        | KU841027 | ✓    | -   | -        | -        | -        | -        | -        | -        | -        |
| 14  | RH77593  | West Garrett                      | Floyd     | KY    | 37.4833  | -82.8311  | -        | KU841028 | ✓    | -   | -        | -        | -        | -        | -        | -        | -        |
| 14  | RH77595  | West Garrett                      | Floyd     | KY    | 37.4833  | -82.8311  | ✓        | KU841029 | ✓    | ✓   | ✓        | ✓        | KU841127 | KU841202 | KU841350 | KU841257 | KU841424 |
| 14  | RH77596  | West Garrett                      | Floyd     | KY    | 37.4833  | -82.8311  | -        | KU841030 | ✓    | -   | -        | -        | -        | -        | -        | -        | -        |
| 15  | SRK3197  | Kanawha State Forest Site 6       | Kanawha   | WV    | 38.1411  | -82.0439  | ✓        | KU840932 | ✓    | ✓   | ✓        | ✓        | KU841069 | KU841146 | KU841296 | KU841262 | KU841369 |
| 16  | RH55651  | Cabwaylingo State Forest          | Wayne     | WV    | 37.9906  | -82.3503  | ✓        | KU840965 | ✓    | ✓   | ✓        | ✓        | KU841086 | KU841162 | KU841309 | KU841260 | KU841385 |
| 16  | RH55652  | Cabwaylingo State Forest          | Wayne     | WV    | 37.9906  | -82.3503  | ✓        | KU840966 | ✓    | ✓   | ✓        | ✓        | KU841087 | KU841163 | KU841310 | KU841258 | KU841386 |
| 16  | RH70763  | Cabwaylingo State Forest          | Wayne     | WV    | 37.9906  | -82.3503  | -        | KU841017 | ✓    | -   | -        | -        | -        | -        | -        | -        | -        |
| 17  | SRK3203  | Mill Cr. Wildlife Management Area | Cabell    | WV    | 38.4951  | -82.1151  | ✓        | KU841062 | ✓    | ✓   | ✓        | ✓        | KU841142 | KU841218 | KU841367 | KU841291 | KU841440 |
| 17  | SRK3204  | Mill Cr. Wildlife Management Area | Cabell    | WV    | 38.4951  | -82.1151  | -        | KU841063 | ✓    | ✓   | ✓        | ✓        | -        | KU841219 | KU841368 | KU841292 | KU841441 |
| 18  | SRK3199  | Beech Fork State Park             | Cabell    | WV    | 38.3138  | -82.3387  | -        | KU841061 | ✓    | ✓   | ✓        | ✓        | -        | -        | KU841366 | KU841290 | KU841439 |



| Pop | Specimen | Locality                          | County     | State | Latitude | Longitude | Complete | mtDNA    | CytB     | ND2      | tRNA-trp | tRNA-ala | BFI      | GAPD     | MLC2A    | ILF3     | RAG-1    |
|-----|----------|-----------------------------------|------------|-------|----------|-----------|----------|----------|----------|----------|----------|----------|----------|----------|----------|----------|----------|
| 36  | RH70699  | Near Middle Knob                  | Washington | VA    | 36.8689  | -81.9722  | ✓        | KU841016 | ✓        | ✓        | ✓        | ✓        | KU841119 | KU841195 | KU841344 | KU841279 | KU841418 |
| 37  | RH51859  | Big Black Mountain                | Harlan     | KY    | 36.9175  | -82.9011  | ✓        | KU840933 | ✓        | ✓        | ✓        | ✓        | KU841070 | KU841147 | KU841297 | KU841226 | KU841370 |
| 37  | RH51866  | Big Black Mountain                | Harlan     | KY    | 36.9175  | -82.9011  | ✓        | KU840934 | ✓        | ✓        | ✓        | ✓        | KU841071 | KU841148 | KU841298 | KU841227 | KU841371 |
| 37  | RH51868  | Big Black Mountain                | Harlan     | KY    | 36.9175  | -82.9011  | -        | KU840935 | ✓        | -        | -        | -        | -        | -        | -        | -        | -        |
| 37  | RH51870  | Big Black Mountain                | Harlan     | KY    | 36.9175  | -82.9011  | -        | KU840936 | ✓        | -        | -        | -        | -        | -        | -        | -        | -        |
| 37  | RH51871  | Big Black Mountain                | Harlan     | KY    | 36.9175  | -82.9011  | -        | KU840937 | ✓        | -        | -        | -        | -        | -        | -        | -        | -        |
| 38  | RH52769  | High Knob                         | Wise       | VA    | 36.8950  | -82.6328  | ✓        | KU840947 | ✓        | ✓        | ✓        | ✓        | KU841076 | KU841153 | KU841303 | KU841269 | KU841376 |
| 38  | RH52770  | High Knob                         | Wise       | VA    | 36.8950  | -82.6328  | -        | KU840948 | -        | ✓        | ✓        | ✓        | -        | -        | -        | -        | -        |
| 38  | RH52779  | High Knob                         | Wise       | VA    | 36.8950  | -82.6328  | -        | KU840949 | ✓        | -        | -        | -        | -        | -        | -        | -        | -        |
| 38  | RH52780  | High Knob                         | Wise       | VA    | 36.8950  | -82.6328  | ✓        | KU840950 | ✓        | ✓        | ✓        | ✓        | KU841077 | KU841154 | KU863658 | KU841252 | KU841377 |
| 38  | RH52783  | High Knob                         | Wise       | VA    | 36.8950  | -82.6328  | -        | KU840951 | ✓        | -        | -        | -        | -        | -        | -        | -        | -        |
| 38  | RH52784  | High Knob                         | Wise       | VA    | 36.8950  | -82.6328  | -        | KU840952 | ✓        | -        | -        | -        | -        | -        | -        | -        | -        |
| 38  | RH74950  | High Knob                         | Wise       | VA    | 36.8950  | -82.6328  | -        | -        | -        | AY875027 | AY875027 | AY875027 | -        | -        | -        | -        | -        |
| 39  | RH64610  | Harlan                            | Harlan     | KY    | 36.8278  | -83.3094  | ✓        | KU840993 | ✓        | ✓        | -        | -        | KU841106 | KU841182 | KU841329 | KU841220 | KU841405 |
| 39  | RH64611  | Harlan                            | Harlan     | KY    | 36.8278  | -83.3094  | -        | KU840994 | ✓        | ✓        | ✓        | ✓        | KU841107 | KU841183 | KU841330 | -        | KU841406 |
| 40  | RH54117  | Bear Wallow Gap                   | Bell       | KY    | 36.7439  | -83.7442  | ✓        | KU840959 | ✓        | ✓        | ✓        | ✓        | KU841083 | KU841159 | KU863659 | KU841246 | KU841382 |
| 40  | RH54118  | Bear Wallow Gap                   | Bell       | KY    | 36.7439  | -83.7442  | ✓        | KU840960 | ✓        | ✓        | ✓        | ✓        | KU841084 | KU841160 | KU863660 | KU841245 | KU841383 |
| 40  | RH54119  | Bear Wallow Gap                   | Bell       | KY    | 36.7439  | -83.7442  | -        | KU840961 | ✓        | -        | -        | -        | -        | -        | -        | -        | -        |
| 40  | RH78194  | Bear Wallow Gap                   | Bell       | KY    | 36.7439  | -83.7442  | -        | KU841045 | ✓        | -        | -        | -        | -        | -        | -        | -        | -        |
| 40  | RH78195  | Bear Wallow Gap                   | Bell       | KY    | 36.7439  | -83.7442  | -        | KU841046 | ✓        | -        | -        | -        | -        | -        | -        | -        | -        |
| 41  | RH64622  | Log Mtn; 5.5 km SSW of Frenchburg | Bell       | KY    | 36.6489  | -83.8494  | ✓        | KU840995 | ✓        | ✓        | ✓        | ✓        | KU841108 | KU841184 | KU841331 | KU841230 | KU841407 |
| 41  | RH64623  | Log Mtn; 5.5 km SSW of Frenchburg | Bell       | KY    | 36.6489  | -83.8494  | ✓        | KU840996 | ✓        | ✓        | ✓        | ✓        | KU841109 | KU841185 | KU841332 | KU841280 | KU841408 |
| 41  | RH64625  | Log Mtn; 5.5 km SSW of Frenchburg | Bell       | KY    | 36.6489  | -83.8494  | -        | KU840997 | ✓        | ✓        | ✓        | -        | -        | -        | -        | -        | -        |
| 41  | RH64627  | Log Mtn; 5.5 km SSW of Frenchburg | Bell       | KY    | 36.6489  | -83.8494  | -        | KU840998 | ✓        | -        | -        | -        | -        | -        | -        | -        | -        |
| 41  | RH66693  | Log Mtn; 5.5 km SSW of Frenchburg | Bell       | KY    | 36.6481  | -83.8494  | -        | -        | DQ994948 | -        | -        | -        | -        | JN798240 | JN798331 | JN798279 | DQ995033 |
| 41  | RH75685  | Log Mtn; 5.5 km SSW of Frenchburg | Bell       | KY    | 36.6481  | -83.8494  | -        | KU841018 | ✓        | ✓        | ✓        | ✓        | KU841120 | KU841196 | -        | -        | -        |
| 41  | RH75690  | Log Mtn; 5.5 km SSW of Frenchburg | Bell       | KY    | 36.6481  | -83.8494  | -        | KU841019 | -        | ✓        | ✓        | ✓        | KU841121 | -        | -        | -        | -        |
| 42  | RH63677  | Ketchen                           | Scott      | TN    | 36.5764  | -84.3072  | ✓        | KU840992 | ✓        | ✓        | ✓        | ✓        | KU841105 | KU841181 | KU841328 | KU841287 | KU841404 |
| 43  | RH77607  | Limestone Cave                    | Whitley    | KY    | 36.6108  | -84.0189  | ✓        | KU841031 | ✓        | ✓        | ✓        | ✓        | KU841128 | KU841203 | KU841351 | KU841243 | KU841425 |
| 43  | RH77608  | Limestone Cave                    | Whitley    | KY    | 36.6108  | -84.0189  | ✓        | KU841032 | ✓        | ✓        | ✓        | ✓        | KU841129 | KU841204 | KU841352 | KU841289 | KU841426 |
| 43  | RH77609  | Limestone Cave                    | Whitley    | KY    | 36.6108  | -84.0189  | -        | KU841033 | ✓        | ✓        | ✓        | -        | -        | -        | -        | -        | -        |
| 43  | RH77610  | Limestone Cave                    | Whitley    | KY    | 36.6108  | -84.0189  | -        | KU841034 | ✓        | -        | -        | -        | -        | -        | -        | -        | -        |
| 43  | RH77611  | Limestone Cave                    | Whitley    | KY    | 36.6108  | -84.0189  | -        | KU841035 | ✓        | -        | -        | -        | -        | -        | -        | -        | -        |
| -   | RH70700  | Near Middle Knob                  | Washington | VA    | 36.8689  | -81.9722  | -        | KU840926 | ✓        | ✓        | ✓        | ✓        | -        | KU841143 | -        | -        | -        |
| -   | RH70701  | Near Middle Knob                  | Washington | VA    | 36.8689  | -81.9722  | -        | KU840927 | ✓        | ✓        | ✓        | ✓        | KU841064 | -        | KU841293 | -        | -        |
| -   | RH70702  | Near Middle Knob                  | Washington | VA    | 36.8689  | -81.9722  | -        | KU840928 | ✓        | ✓        | ✓        | ✓        | KU841065 | -        | -        | -        | -        |
| -   | RH70703  | Near Middle Knob                  | Washington | VA    | 36.8689  | -81.9722  | -        | KU840929 | ✓        | ✓        | ✓        | ✓        | KU841066 | -        | -        | -        | -        |
