# Supplementary material for: Multilocus Phylogeography and Species Delimitation in the Cumberland Plateau Salamander, Plethodon kentucki: Incongruence among Data Sets and Methods
Source: PubMed Central journal article supplement (PMC4790894; doi:10.1371/journal.pone.0150022), 2016-03-14
Supplement: pone.0150022.s002.pdf [file pone.0150022.s002.pdf]

## Appendix S2

We estimated rates of molecular evolution using Bayesian relaxed-clock dating with PAML 4.1 [1] and the set of programs in Multidistribute [2-4]. Methods are presented in the text, but here we expand upon the locus BFI, which had few sequences available outside of *P. kentucki*. First, we estimated the rate of evolution using a three-taxon statement, with *P. wehrlei* as the outgroup and *P. glutinosus* + *P. kentucki* as the ingroup. This is described in the main text. Because this estimate of molecular evolution was derived from limited sampling, we also estimated the rate of evolution for BFI using a phylogeny of the Salamandridae from Zhang et al.[5] in combination with sequence data on salamandrids from Sequeira et al.[6]. The outgroup was designated as *Salamandrina terdigitata*, and the ingroup included nine taxa from eight genera (Fig. B). The upper and lower limits on node ages were set based on the BEAST 2 analyses of Zhang et al. [5], including both their primary and additional calibration points (see [5] for details). For all loci, MCMC analyses included 100,000 generations of burn-in. Thereafter, the Markov chain was sampled every 100 generations until 10,000 samples were collected.

When BFI was calibrated using *Plethodon*, the estimated rate of evolution was 0.036%/myr, which is an intermediate rate among the nuclear loci. When BFI was dated using salamandrids, the estimated rate of evolution given the two different calibrations was 0.091%/myr (primary calibration) and 0.197%/myr (additional calibrations; see [7]). These rates are higher than those estimated for our other nuclear loci. For our analyses, we used the *Plethodon* calibration.

## References

1. Yang Z. PAML: a program package for phylogenetic analysis by maximum likelihood. *Comput Appl Biosci.* 1997;13: 555–556.
2. Thorne JL, Kishino H, Painter IS. Estimating the rate of evolution of the rate of molecular evolution. *Mol Biol Evol.* 1998;15: 1647–1657.
3. Kishino H, Thorne JL, Bruno WJ. Performance of a divergence time estimation method under a probabilistic model of rate evolution. *Mol Biol Evol.* 2001;18: 352–361.
4. Thorne JL, Kishino H. Divergence time and evolutionary rate estimation with multilocus data. *Syst Biol.* 2002;51: 689–702. doi:10.1080/10635150290102456
5. Zhang P, Papenfuss TJ, Wake MH, Qu L, Wake DB. Phylogeny and biogeography of the family Salamandridae (Amphibia: Caudata) inferred from complete mitochondrial genomes. *Mol Phylogenet Evol.* 2008;49: 586–597. doi:10.1016/j.ympev.2008.08.020
6. Sequeira F, Ferrand N, Harris DJ. Assessing the phylogenetic signal of the nuclear b-Fibrinogen intron 7 in salamandrids (Amphibia: Salamandridae). *Amphibia-Reptilia.* Springer; 2006;27: 409–418.
7. Zhang P, Chen Y-Q, Zhou H, Liu Y-F, Wang X-L, Papenfuss TJ, et al. Phylogeny, evolution, and biogeography of Asiatic Salamanders (Hynobiidae). *Proceedings of the National Academy of Sciences of the United States of America.* 2006;103: 7360–7365. doi:10.1073/pnas.0602325103

**Table B. Species and indention numbers of taxa and loci used in the multidivtime analysis.** GenBank numbers are provided.

| <b>Species</b>    | <b>Cyt b</b> | <b>ND2</b> | <b>tRNAs</b> | <b>MLC2A</b> | <b>GAPD</b> | <b>RAG1</b> | <b>ILF3</b> | <b>BFI</b> |
|-------------------|--------------|------------|--------------|--------------|-------------|-------------|-------------|------------|
| <i>albagula</i>   | DQ994905.1   | DQ018689.1 | DQ018689     | JN798307.1   | JN798216.1  | DQ995008    | JN798264.1  | –          |
| <i>amplus</i>     | DQ994912.1   | AY874880.1 | AY874880.1   | JN798308.1   | JN798217.1  | DQ995010    | JN798265.1  | –          |
| <i>angusticla</i> | DQ994913.1   | DQ018676.1 | DQ018676.1   | –            | JN798218.1  | DQ995011    | –           | –          |
| <i>caddoensis</i> | DQ994916.1   | AY874875.1 | AY874875.1   | JN798311.1   | JN798221.1  | DQ995013    | JN798268.1  | –          |
| <i>chattahooc</i> | DQ994919.1   | –          | –            | JN798312.1   | JN798222.1  | DQ995014    | JN798269.1  | –          |
| <i>cheoah</i>     | DQ994921.1   | –          | –            | JN798313.1   | JN798223.1  | DQ995015    | JN798270.1  | –          |
| <i>chlorobryo</i> | DQ994923.1   | –          | –            | JN798314.1   | JN798224.1  | –           | JN798271.1  | –          |
| <i>cinereus</i>   | AY378030     | AY874875.1 | AY874875.1   | JN798317.1   | JN798226.1  | DQ995017    | –           | –          |
| <i>cylindrace</i> | DQ994928.1   | –          | –            | JN798318.1   | JN798229.1  | DQ995022    | JN798272.1  | –          |
| <i>dorsalis</i>   | AY378077.1   | DQ018678.1 | DQ018678.2   | JN798319.1   | –           | DQ995023    | JN798273.1  | –          |
| <i>electromor</i> | DQ994932.1   | DQ018665.1 | DQ018665.2   | JN798320.1   | JN798230.1  | DQ995025    | –           | –          |
| <i>elongatus</i>  | AY691746.1   | –          | –            | –            | –           | –           | –           | –          |
| <i>fourchensi</i> | DQ994933.1   | AY874876.1 | AY874876.2   | JN798321.1   | JN798232.1  | DQ995026    | JN798274.1  | –          |
| <i>glutinosus</i> | –            | –          | –            | –            | –           | –           | –           | KU841065   |
| <i>grobmani</i>   | DQ994941.1   | DQ018695.1 | DQ018695.2   | JN798325.1   | JN798236.1  | DQ995028    | JN798277.1  | –          |
| <i>hoffmani</i>   | AY378048.1   | DQ018666.1 | DQ018666.2   | JN798327.1   | JN798238.1  | DQ995029    | –           | –          |
| <i>hubrichti</i>  | AY378058.1   | DQ018667.1 | DQ018667.2   | JN798328.1   | JN798239.1  | DQ995030    | –           | –          |
| <i>idahoensis</i> | DQ994945.1   | –          | –            | JN798329.1   | –           | DQ995031    | –           | –          |
| <i>jordani</i>    | DQ994947.1   | AY874887.1 | AY874887.2   | JN798330.1   | –           | DQ995032    | JN798278.1  | –          |
| <i>kentucki</i>   | DQ994948.1   | KU841032   | KU841032     | JN798331.1   | JN798240.1  | DQ995033    | JN798279.1  | KU841122   |
| <i>kiamichi</i>   | DQ994950.1   | DQ018696.1 | DQ018696.2   | JN798332.1   | JN798241.1  | DQ995034    | JN798280.1  | –          |
| <i>kisatchie</i>  | DQ994951.1   | DQ018698.1 | DQ018698.2   | JN798333.1   | JN798242.1  | DQ995035    | JN798281.1  | –          |
| <i>meridianus</i> | DQ994954.1   | AY874898.1 | AY874898.2   | JN798335.1   | JN798244.1  | DQ995038    | JN798283.1  | –          |
| <i>metcalfi</i>   | DQ994956.1   | AY874903.1 | AY874903.2   | –            | JN798245.1  | DQ995040    | JN798284.1  | –          |
| <i>mississipp</i> | DQ994958.1   | DQ018700.1 | DQ018700.2   | –            | JN798246.1  | –           | JN798285.1  | –          |
| <i>montanus</i>   | DQ994961.1   | AY874960.1 | AY874960.2   | JN798336.1   | JN798247.1  | DQ995042    | JN798286.1  | –          |
| <i>nettingi</i>   | DQ994964.1   | –          | –            | –            | JN798248.1  | DQ995045    | –           | –          |

| <b>Species</b>    | <b>Cyt b</b> | <b>ND2</b> | <b>tRNAs</b> | <b>MLC2A</b> | <b>GAPD</b> | <b>RAG1</b> | <b>ILF3</b> | <b>BFI</b> |
|-------------------|--------------|------------|--------------|--------------|-------------|-------------|-------------|------------|
| <i>ocmulgee</i>   | DQ994967.1   | DQ018702.1 | DQ018702.2   | JN798338.1   | JN798250.1  | DQ995048    | JN798288.1  | –          |
| <i>ouachitae</i>  | Y691747.1    | AY874877.1 | AY874877.2   | –            | JN798251.1  | –           | JN798289.1  | –          |
| <i>petraeus</i>   | DQ994973.1   | AY874878.1 | AY874878.2   | JN798339.1   | JN798252.1  | DQ995049    | JN798290.1  | –          |
| <i>punctatus</i>  | AY378078.1   | DQ018685.1 | DQ018685.2   | –            | JN798253.1  | DQ995050    | JN798291.1  | –          |
| <i>richmondi</i>  | AY378070.1   | DQ018670.1 | DQ018670.2   | JN798340.1   | JN798254.1  | DQ995051    | –           | –          |
| <i>savannah</i>   | DQ994978.1   | –          | –            | JN798341.1   | JN798255.1  | DQ995055    | JN798292.1  | –          |
| <i>sequoyah</i>   | DQ994979.1   | DQ018705.1 | –            | JN798342.1   | –           | DQ995056    | JN798293.1  | –          |
| <i>serratus</i>   | AY378073.1   | DQ018671.1 | DQ018671.2   | JN798343.1   | JN798256.1  | DQ995057    | –           | –          |
| <i>shenandoah</i> | AY378043.1   | DQ018674.1 | DQ018674.2   | JN798345.1   | JN798257.1  | DQ995062    | –           | –          |
| <i>teyahalee</i>  | DQ994990.1   | –          | –            | JN798347.1   | –           | DQ995068    | JN798295.1  | –          |
| <i>vandykei</i>   | AY691759.1   | –          | –            | –            | JN798260.1  | –           | –           | –          |
| <i>variolatus</i> | DQ994991.1   | –          | –            | JN798348.1   | –           | DQ995069    | JN798296.1  | –          |
| <i>vehiculum</i>  | AY691760.1   | DQ018661.1 | DQ018661.2   | JN798349.1   | –           | –           | –           | –          |
| <i>ventralis</i>  | DQ994993.1   | DQ018680.1 | DQ018680.2   | JN798350.1   | JN798261.1  | DQ995071    | JN798297.1  | –          |
| <i>virginia</i>   | AY378049.1   | DQ018675.1 | DQ018675.2   | JN798351.1   | –           | DQ995072    | JN798298.1  | –          |
| <i>websteri</i>   | AY378076.1   | –          | –            | JN798352.1   | –           | DQ995073    | JN798299.1  | –          |
| <i>wehrlei</i>    | AY378079.1   | DQ018686.1 | DQ018686.2   | JN798353.1   | –           | DQ995075    | JN798300.1  | KU863657   |
| <i>welleri</i>    | AY691761.1   | –          | –            | –            | JN798262.1  | –           | JN798301.1  | –          |
| <i>yonahlosse</i> | AY378075.1   | AY874879.1 | AY874879.2   | JN798354.1   | JN798263.1  | DQ995078    | JN798302.1  | –          |

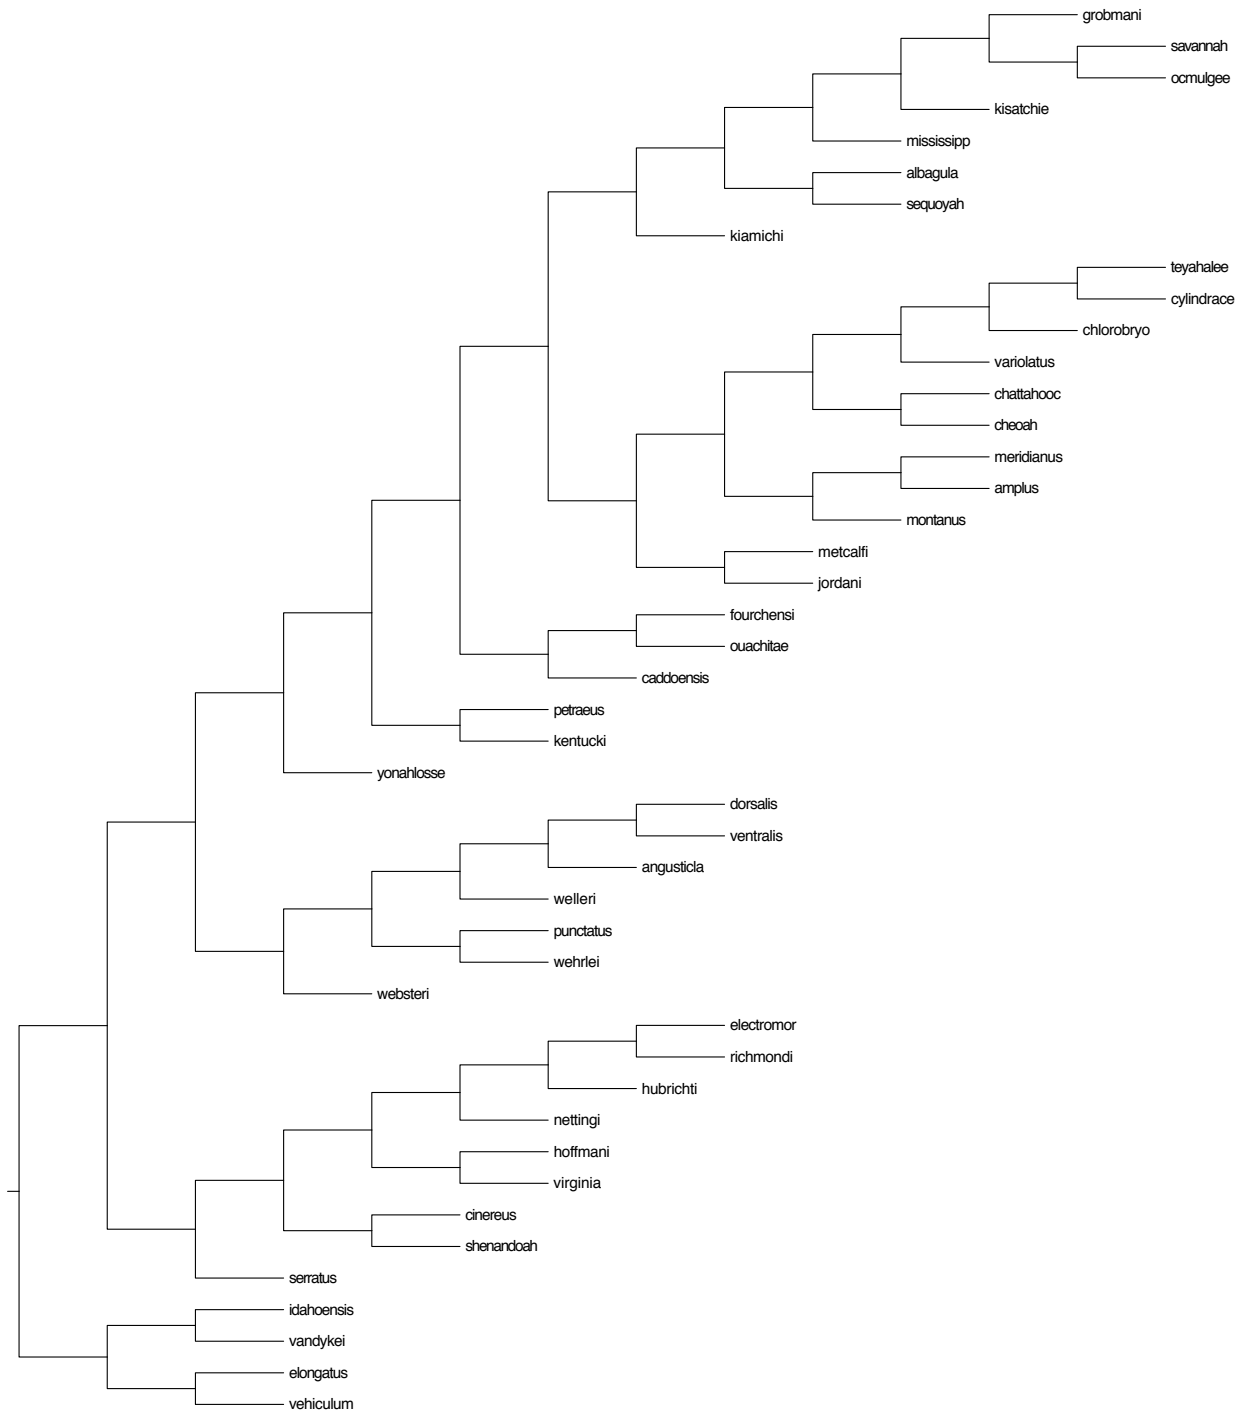

**Figure A. Phylogeny of *Plethodon* used in the Multidivtime analyses. See text for details.**

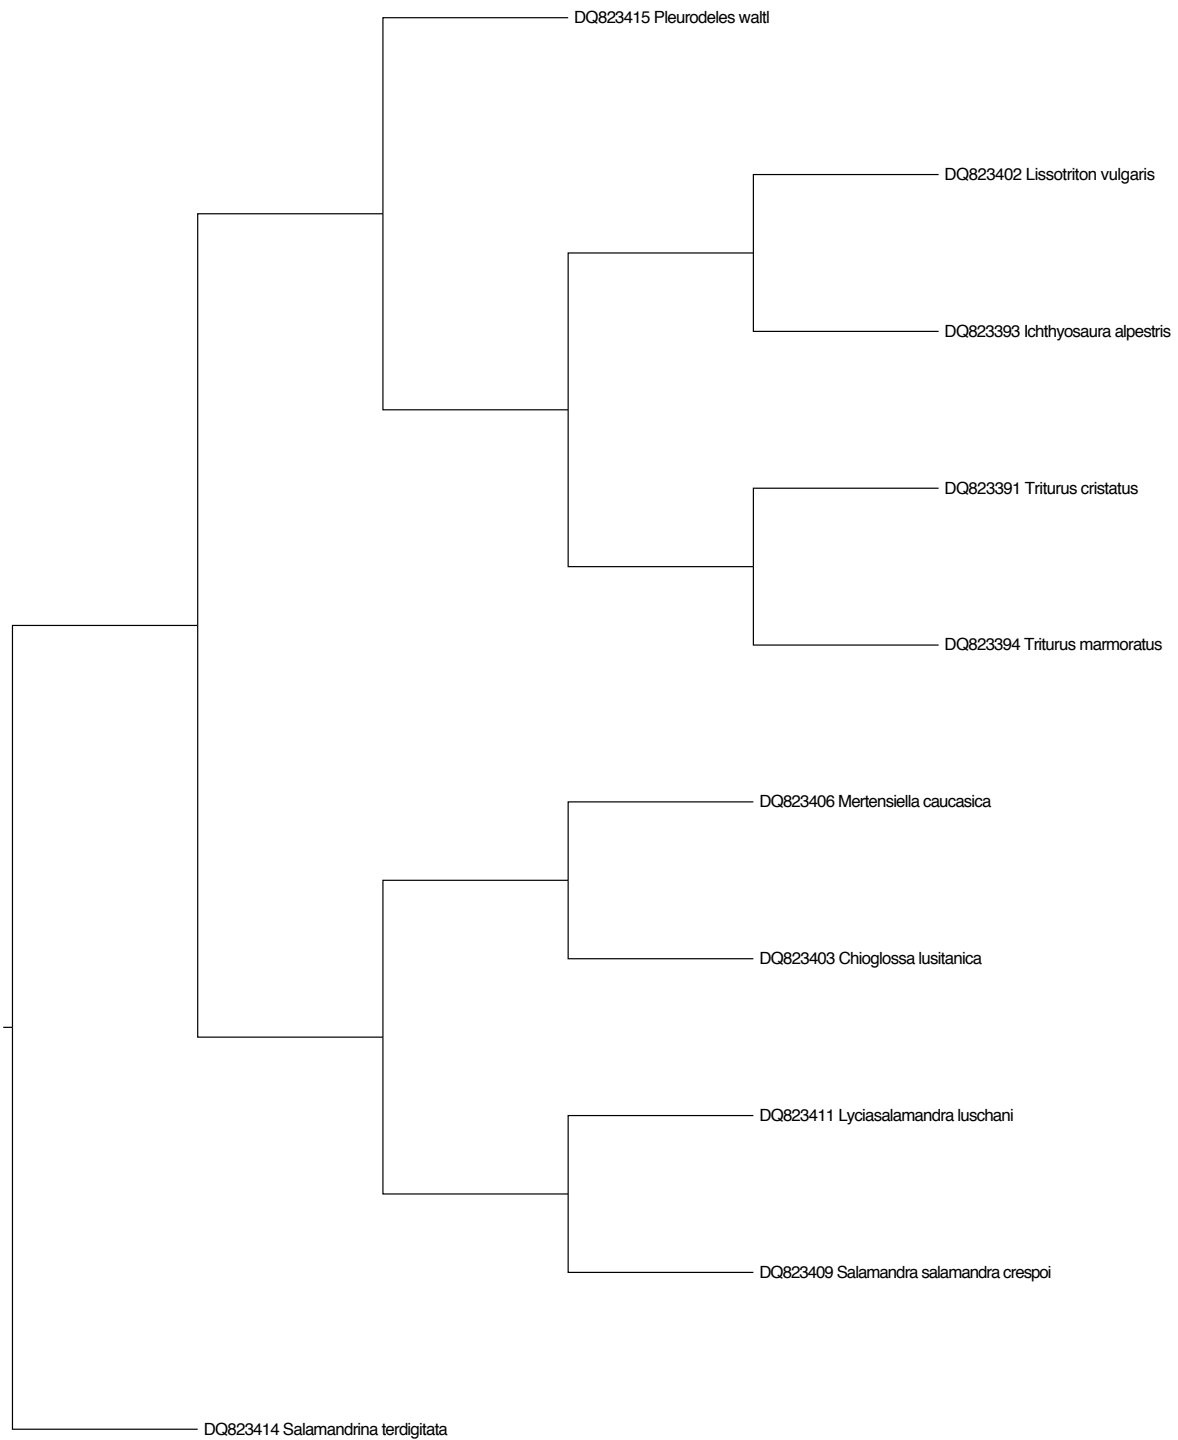

**Figure B. Phylogeny of Salamandridae used in the Multidivtime analyses.** See text for details.
