# Supplementary material for: Multilocus Phylogeography and Species Delimitation in the Cumberland Plateau Salamander, Plethodon kentucki: Incongruence among Data Sets and Methods
Source: PubMed Central journal article supplement (PMC4790894; doi:10.1371/journal.pone.0150022), 2016-03-14
Supplement: pone.0150022.s003.pdf [file pone.0150022.s003.pdf]

## **Appendix S3**

### **Gene trees for nuclear loci**

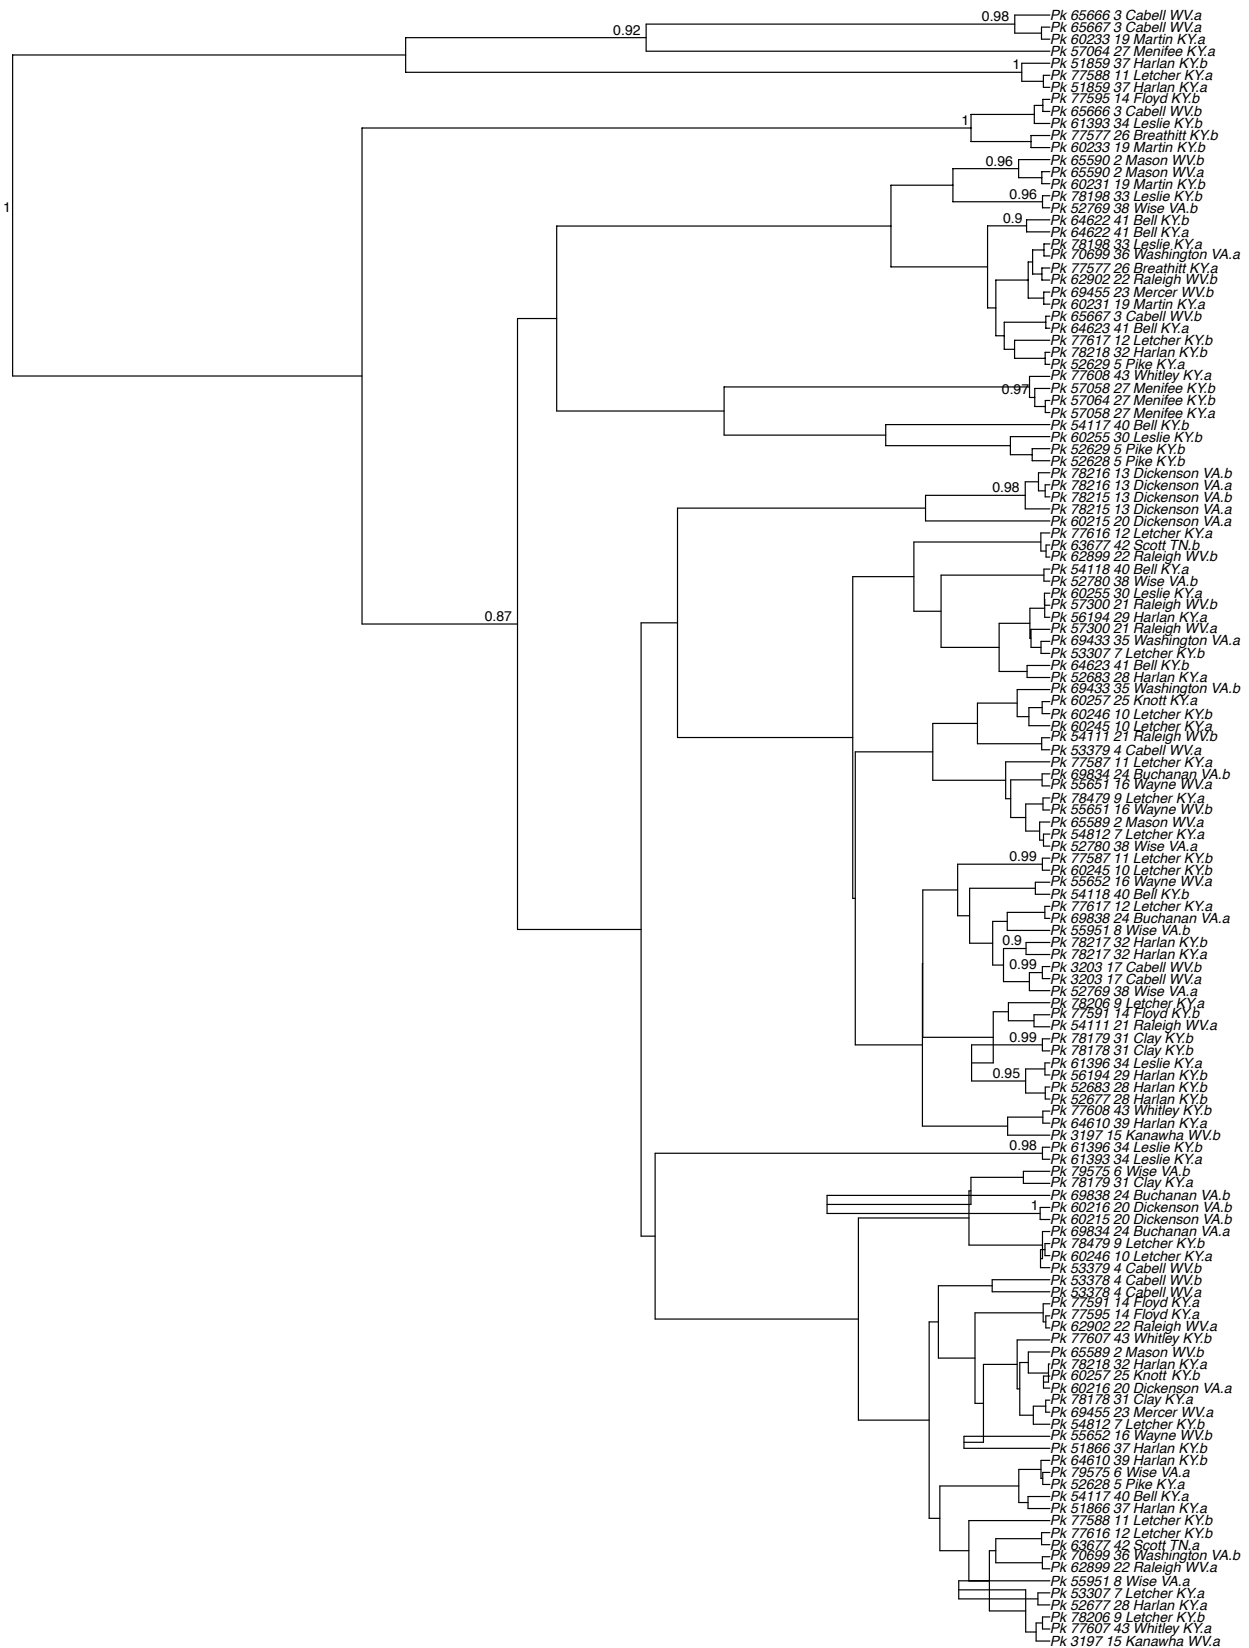

**Figure C. Gene tree of BFI.** Specimen numbers correspond with the S1 Appendix, and population numbers correspond with Figure 1 in the text.



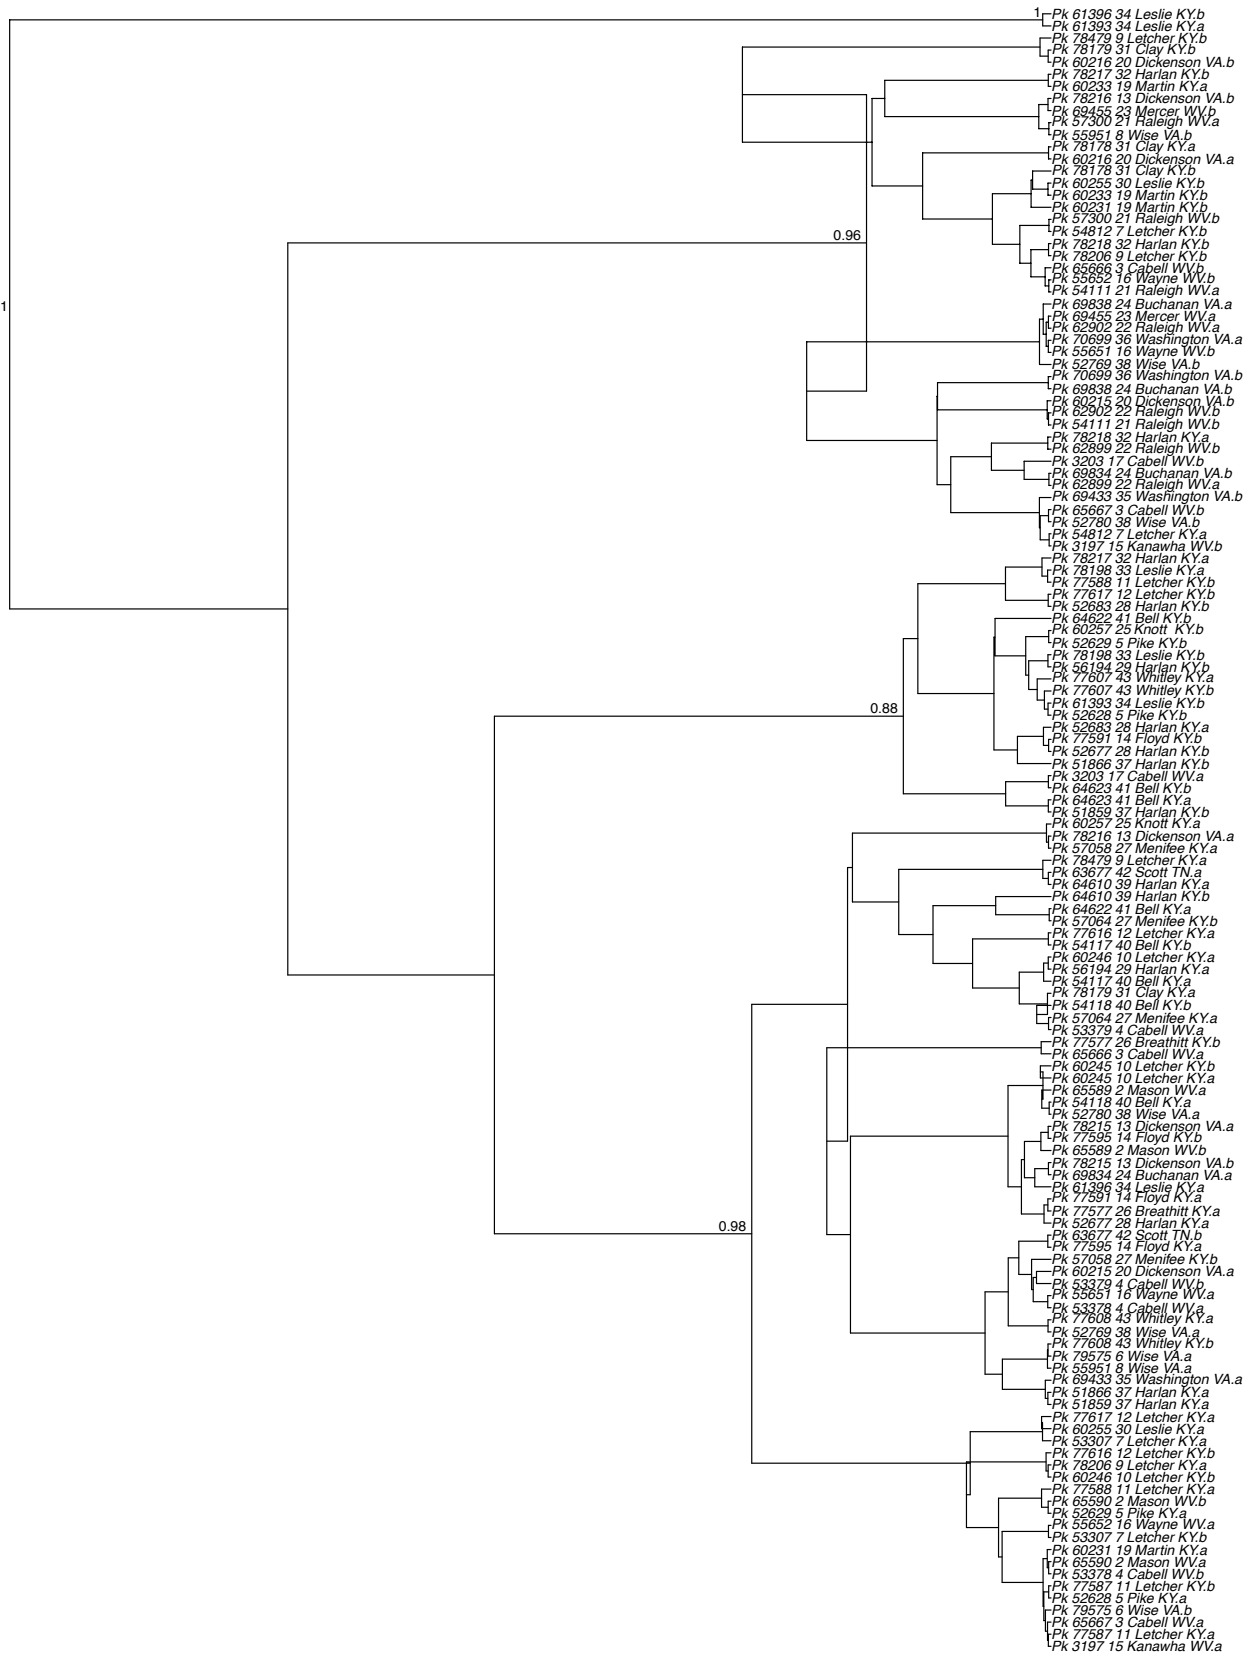

**Figure E. Gene tree of ILF3.** Specimen numbers correspond with the S1 Appendix, and population numbers correspond with Figure 1 in the text.

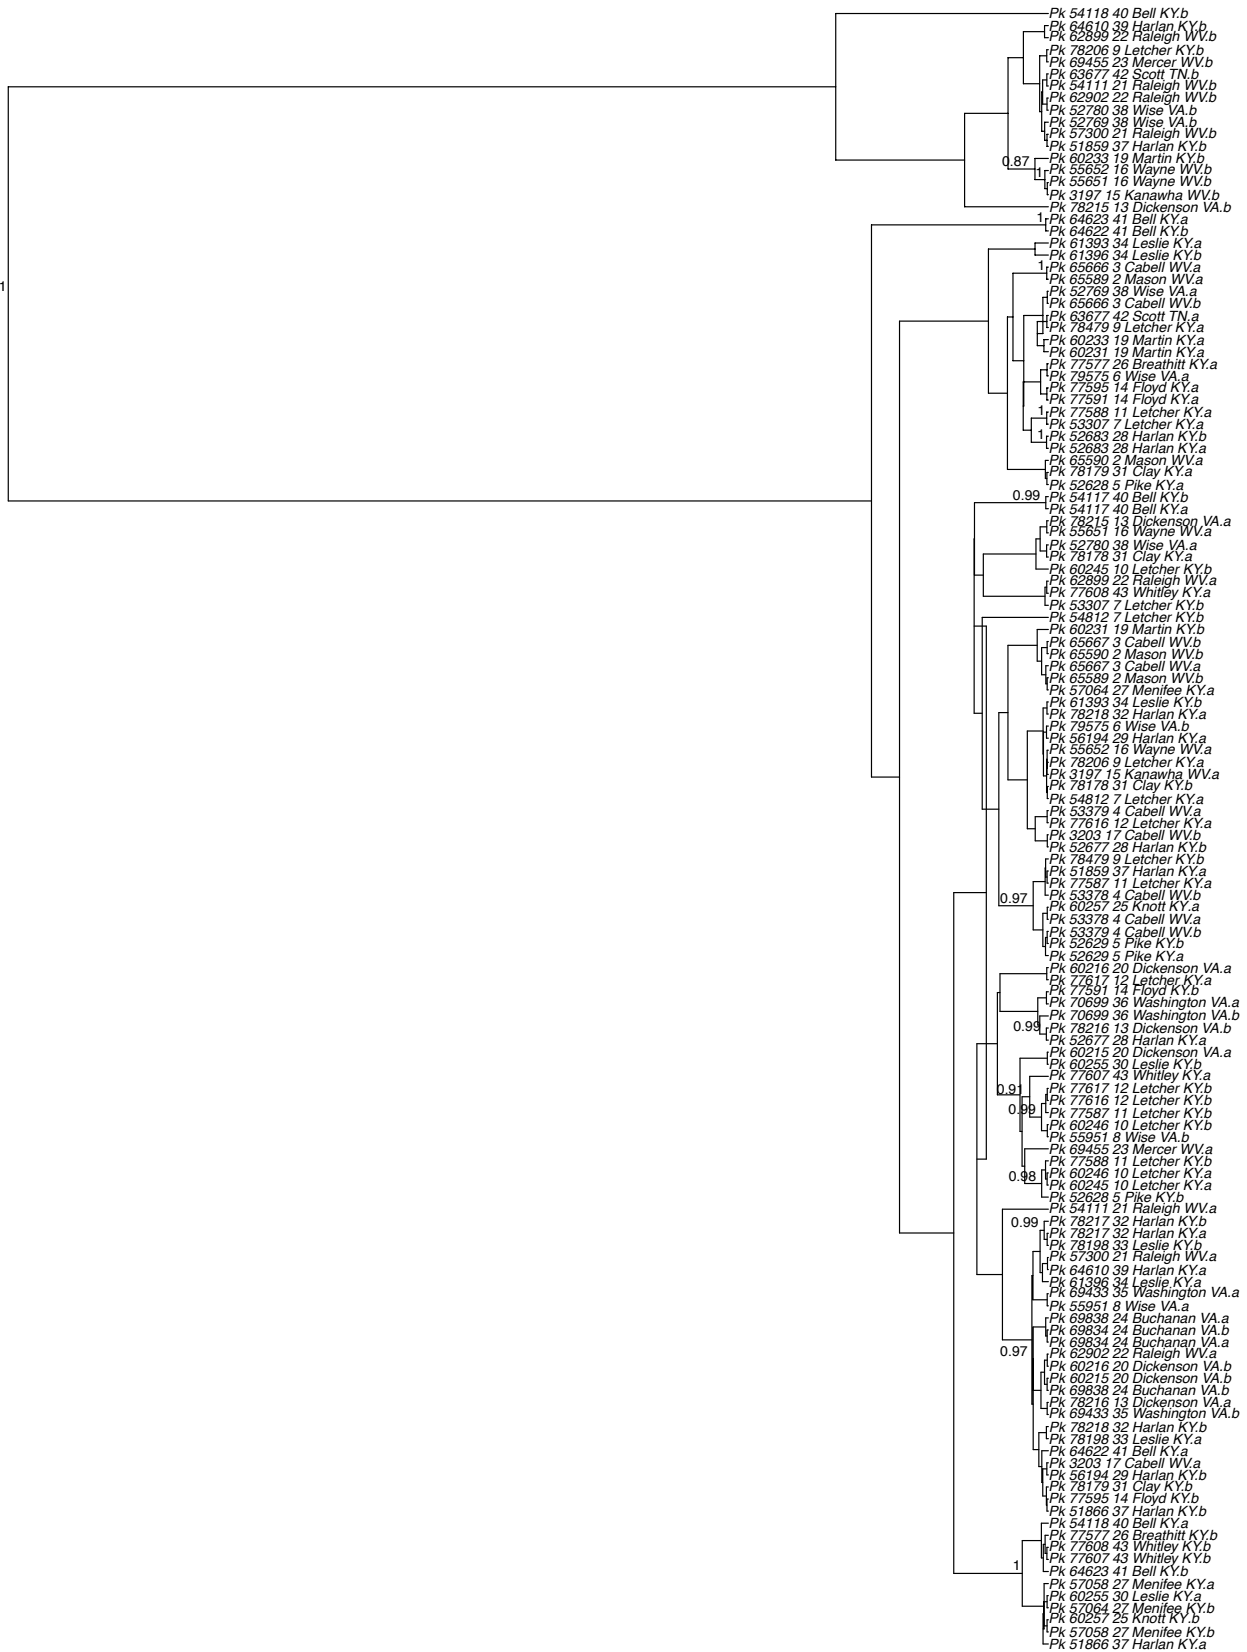

**Figure F. Gene tree of MLC2A.** Specimen numbers correspond with the S1 Appendix, and population numbers correspond with Figure 1 in the text.
