# Supplementary material for: Multilocus Phylogeography and Species Delimitation in the Cumberland Plateau Salamander, Plethodon kentucki: Incongruence among Data Sets and Methods
Source: PubMed Central journal article supplement (PMC4790894; doi:10.1371/journal.pone.0150022), 2016-03-14
Supplement: pone.0150022.s004.pdf [file pone.0150022.s004.pdf]

## **Appendix S4**

**Concatenated analyses using RAxML, including a phylogeny of the nuclear loci, and a phylogeny with both nuclear and mtDNA loci.**

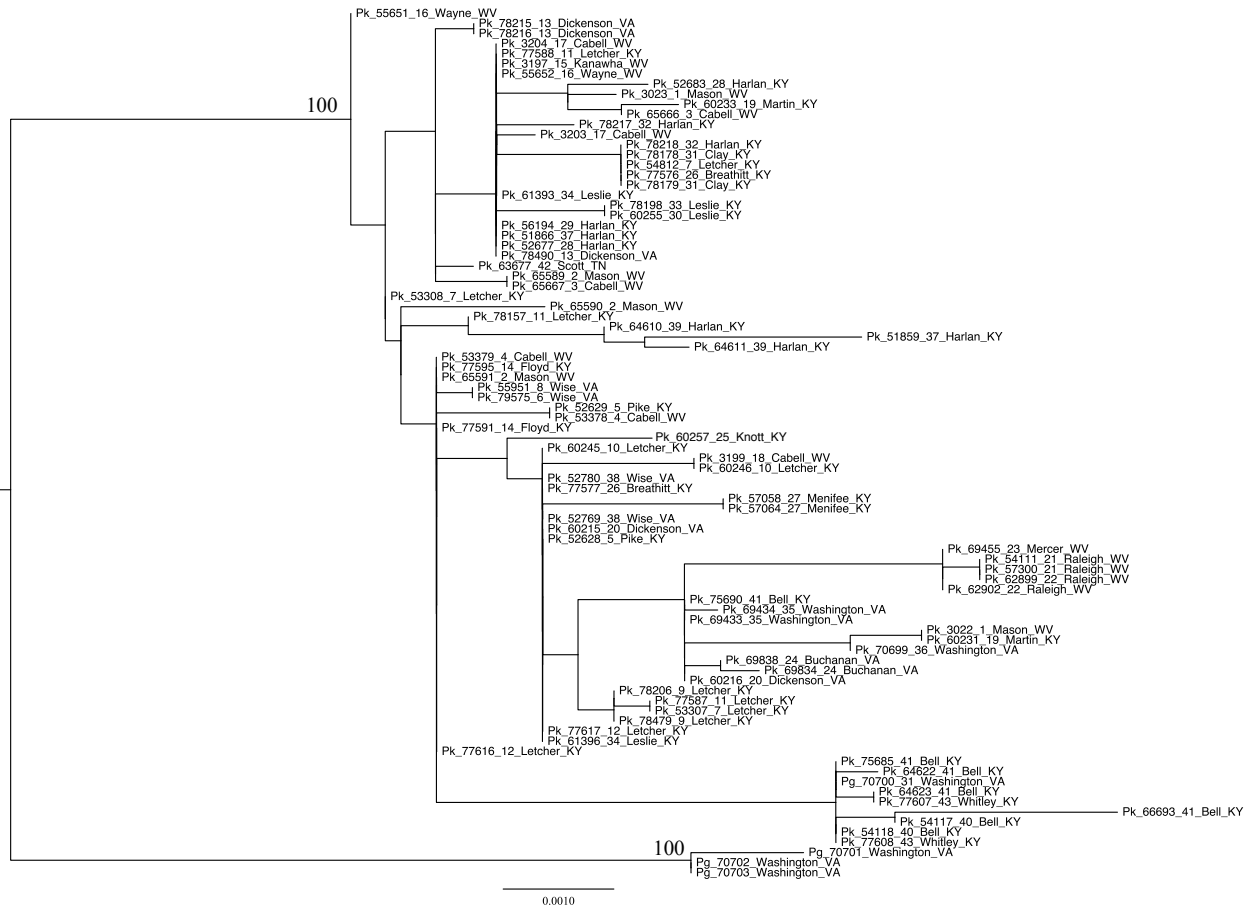

**Figure H. Maximum likelihood analysis of the concatenated nuclear DNA data. MtDNA data not included. Analysis done in RAxML.**
