# Supplementary material for: Multilocus Phylogeography and Species Delimitation in the Cumberland Plateau Salamander, Plethodon kentucki: Incongruence among Data Sets and Methods
Source: PubMed Central journal article supplement (PMC4790894; doi:10.1371/journal.pone.0150022), 2016-03-14
Supplement: pone.0150022.s005.pdf [file pone.0150022.s005.pdf]

## Appendix S5: Brownie Results

We analyzed numerous data sets using Brownie, as described in the Materials and Methods in the main text. When the nuclear data alone were analyzed, four replicate data sets delimited non-overlapping species, with the number of delimited species in data sets 1-3 ranging from 5-23 (Tables C-E). In data set 4, 2333 unique species trees were recovered, with 2007 separate delimited species. A majority rule consensus tree recovered one species including three individuals from populations 14 and 28 (Fig. J), but the other individuals were all placed into a basal polytomy. In all analyses, the delimited species did not include all the individuals from a population, and did not form geographically cohesive groups.

In a second set of analyses, we added mtDNA data to the nuclear data sets. For data set 1, all 500 runs recovered *P. kentucki* as a single species. In data set 2, two species were recovered, one including single individuals from populations 6, 9, and 17, and the other including all the other samples (Table F). The first species includes individuals from widely spaced populations, and does not include all the individuals from the included populations. In data set 3, 12618 trees were recovered from the 500 runs, including 8556 unique species tree topologies and 5018 delimited species. A majority rule consensus tree delimited three species, each with two individuals, while all other individuals formed a basal polytomy (Fig. K). Again, of the three delimited species, none formed a geographically cohesive group or included all of the individuals from their respective populations. In data set 4, two species were recovered in all 500 runs, one including a single individual from each of populations 7 and 19, and the other including all the remaining samples (Table G). The former does not form a geographically cohesive

group, or include all the individuals from the included populations. In summary, when we combined mtDNA and nuclear DNA, the delimited species varied widely among analyses. Only the run that delimited *P. kentucki* as a single species recovered a species that is geographically cohesive and does not split individuals from a single population into separate species.

Finally, we conducted an analysis of the diploid nuclear data, with both alleles from each individual included. This doubles the sample size, but does not account for the hierarchical structure of genetic material (i.e., that there are two alleles/individual). Niemiller et al. [1] found that including a phased nuclear data set increased the number of delimited species, as did increasing the number of individuals and loci sampled. In general, they recommended that a single allele per individual be used, but that analyses on phased data are valuable to determine if heterozygous individuals are split into separate species. Our analysis of the diploid data set recovered 24 unique species trees and 36 species (Table H). In every delimited species, alleles from a single individual were separated into separate species.

In sum, Brownie did not reliably delimit species. Vast differences were recovered when different data sets were used. The delimited species did not form contiguous geographic groups, and typically did not include all the individuals from single populations. This was true whether or not mtDNA was included. Thus, we did not further test the validity of these species.

### Reference

1. Niemiller ML, Near TJ, Fitzpatrick BM. Delimiting species using multilocus data: diagnosing cryptic diversity in the southern cavefish, *Typhlichthys subterraneus* (Teleostei: Amblyopsidae). *Evolution*. 2011;66: 846–866. doi:10.1111/j.1558-5646.2011.01480.x



**Table D. Species delimited by Brownie using data set 2.** The results of 500 independent runs are shown here. Grey boxes indicate inclusion in a partition. 500 trees were recovered (1/run). The alleles in this set of runs and the set illustrated in Table S do not overlap for heterozygous individuals.

|       | Number   | 500        | 499  | 1     | 1     | 1     |       |       |
|-------|----------|------------|------|-------|-------|-------|-------|-------|
|       | Specimen | Population | Freq | 1.000 | 0.998 | 0.002 | 0.002 | 0.002 |
| 65589 | 2        |            |      |       |       |       |       |       |
| 65590 | 2        |            |      |       |       |       |       |       |
| 65666 | 3        |            |      |       |       |       |       |       |
| 65667 | 3        |            |      |       |       |       |       |       |
| 53378 | 4        |            |      |       |       |       |       |       |
| 53379 | 4        |            |      |       |       |       |       |       |
| 52628 | 5        |            |      |       |       |       |       |       |
| 52629 | 5        |            |      |       |       |       |       |       |
| 79575 | 6        |            |      |       |       |       |       |       |
| 53307 | 7        |            |      |       |       |       |       |       |
| 54812 | 7        |            |      |       |       |       |       |       |
| 55951 | 8        |            |      |       |       |       |       |       |
| 78206 | 9        |            |      |       |       |       |       |       |
| 78479 | 9        |            |      |       |       |       |       |       |
| 60245 | 10       |            |      |       |       |       |       |       |
| 60246 | 10       |            |      |       |       |       |       |       |
| 77587 | 11       |            |      |       |       |       |       |       |
| 77588 | 11       |            |      |       |       |       |       |       |
| 77616 | 12       |            |      |       |       |       |       |       |
| 77617 | 12       |            |      |       |       |       |       |       |
| 78215 | 13       |            |      |       |       |       |       |       |
| 78216 | 13       |            |      |       |       |       |       |       |
| 77591 | 14       |            |      |       |       |       |       |       |
| 77595 | 14       |            |      |       |       |       |       |       |
| 3197  | 15       |            |      |       |       |       |       |       |
| 55651 | 16       |            |      |       |       |       |       |       |
| 55652 | 16       |            |      |       |       |       |       |       |
| 3203  | 17       |            |      |       |       |       |       |       |
| 60231 | 19       |            |      |       |       |       |       |       |
| 60233 | 19       |            |      |       |       |       |       |       |
| 60215 | 20       |            |      |       |       |       |       |       |
| 60216 | 20       |            |      |       |       |       |       |       |
| 54111 | 21       |            |      |       |       |       |       |       |
| 57300 | 21       |            |      |       |       |       |       |       |
| 62899 | 22       |            |      |       |       |       |       |       |
| 62902 | 22       |            |      |       |       |       |       |       |
| 69455 | 23       |            |      |       |       |       |       |       |
| 69834 | 24       |            |      |       |       |       |       |       |
| 69838 | 24       |            |      |       |       |       |       |       |
| 60257 | 25       |            |      |       |       |       |       |       |
| 77577 | 26       |            |      |       |       |       |       |       |
| 57058 | 27       |            |      |       |       |       |       |       |
| 57064 | 27       |            |      |       |       |       |       |       |
| 52677 | 28       |            |      |       |       |       |       |       |
| 52683 | 28       |            |      |       |       |       |       |       |
| 56194 | 29       |            |      |       |       |       |       |       |
| 60255 | 30       |            |      |       |       |       |       |       |
| 78178 | 31       |            |      |       |       |       |       |       |
| 78179 | 31       |            |      |       |       |       |       |       |
| 78217 | 32       |            |      |       |       |       |       |       |
| 78218 | 32       |            |      |       |       |       |       |       |
| 78198 | 33       |            |      |       |       |       |       |       |
| 61393 | 34       |            |      |       |       |       |       |       |
| 61396 | 34       |            |      |       |       |       |       |       |
| 69433 | 35       |            |      |       |       |       |       |       |
| 70699 | 36       |            |      |       |       |       |       |       |
| 51859 | 37       |            |      |       |       |       |       |       |
| 51866 | 37       |            |      |       |       |       |       |       |
| 52769 | 38       |            |      |       |       |       |       |       |
| 52780 | 38       |            |      |       |       |       |       |       |
| 64610 | 39       |            |      |       |       |       |       |       |
| 54117 | 40       |            |      |       |       |       |       |       |
| 54118 | 40       |            |      |       |       |       |       |       |
| 64622 | 41       |            |      |       |       |       |       |       |
| 64623 | 41       |            |      |       |       |       |       |       |
| 63677 | 42       |            |      |       |       |       |       |       |
| 77607 | 43       |            |      |       |       |       |       |       |
| 77608 | 43       |            |      |       |       |       |       |       |



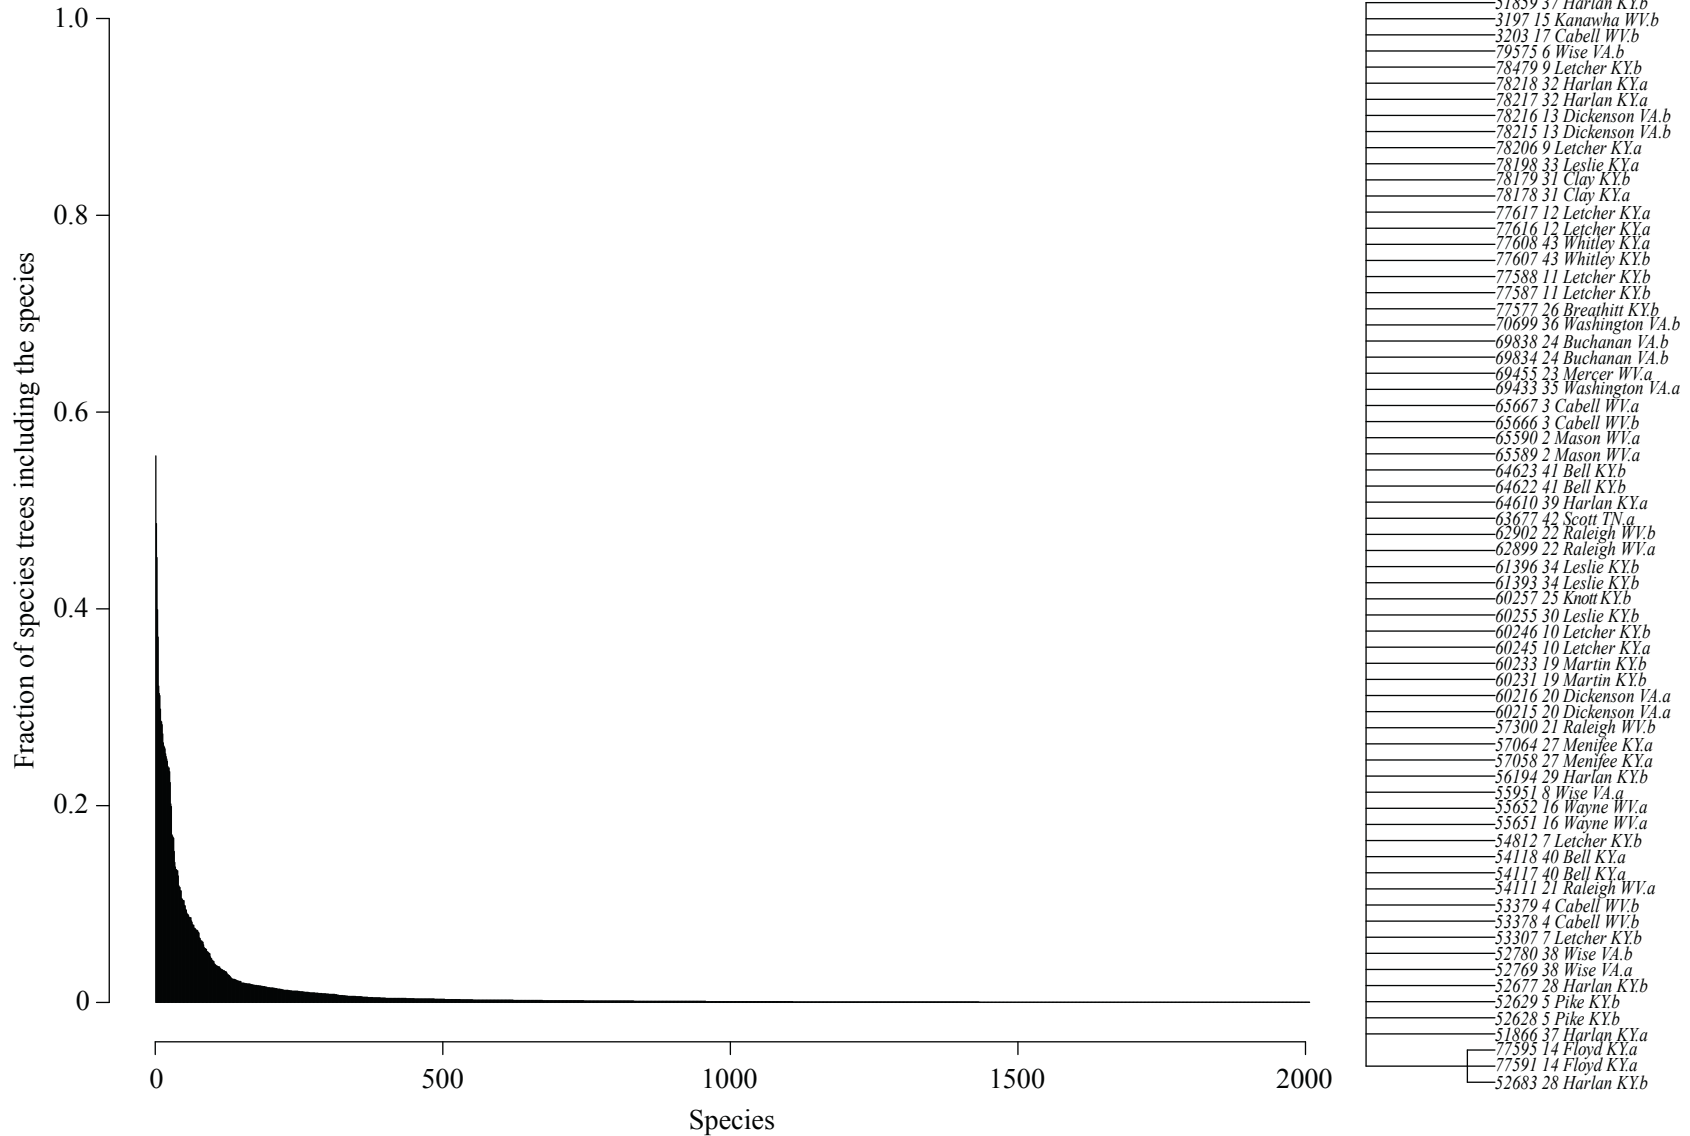

**Fig. J. Summary of 500 replicate runs in Brownie with data set 4.** 2333 unique species tree topologies were recovered, including 2007 delimited species. The graph shows that most of these species were recovered in a small number of trees. A majority rule consensus tree is provided in the right portion of the figure, showing the one species that was recovered in >50% of trees.

**Table F. Species delimited by Brownie using data set 2 with mtDNA.** The results of 500 independent runs are shown here. Grey boxes indicate inclusion in a delimited species. Two species were consistently delimited in this analysis

| Specimen | Number<br>Freq<br>Population | 500<br>1.0 | 500<br>1.0 |
|----------|------------------------------|------------|------------|
| 65589    | 2                            |            | Grey       |
| 65590    | 2                            |            | Grey       |
| 65666    | 3                            |            | Grey       |
| 65667    | 3                            |            | Grey       |
| 53378    | 4                            |            | Grey       |
| 53379    | 4                            |            | Grey       |
| 52628    | 5                            |            | Grey       |
| 52629    | 5                            |            | Grey       |
| 79575    | 6                            | Grey       | Grey       |
| 53307    | 7                            |            | Grey       |
| 54812    | 7                            |            | Grey       |
| 55951    | 8                            |            | Grey       |
| 78206    | 9                            |            | Grey       |
| 78479    | 9                            | Grey       | Grey       |
| 60245    | 10                           |            | Grey       |
| 60246    | 10                           |            | Grey       |
| 77587    | 11                           |            | Grey       |
| 77588    | 11                           |            | Grey       |
| 77616    | 12                           |            | Grey       |
| 77617    | 12                           |            | Grey       |
| 78215    | 13                           |            | Grey       |
| 78216    | 13                           |            | Grey       |
| 77591    | 14                           |            | Grey       |
| 77595    | 14                           |            | Grey       |
| 3197     | 15                           |            | Grey       |
| 55651    | 16                           |            | Grey       |
| 55652    | 16                           |            | Grey       |
| 3203     | 17                           | Grey       | Grey       |
| 60231    | 19                           |            | Grey       |
| 60233    | 19                           |            | Grey       |
| 60215    | 20                           |            | Grey       |
| 60216    | 20                           |            | Grey       |
| 54111    | 21                           |            | Grey       |
| 57300    | 21                           |            | Grey       |
| 62899    | 22                           |            | Grey       |
| 62902    | 22                           |            | Grey       |
| 69455    | 23                           |            | Grey       |
| 69834    | 24                           |            | Grey       |
| 69838    | 24                           |            | Grey       |
| 60257    | 25                           |            | Grey       |
| 77577    | 26                           |            | Grey       |
| 57058    | 27                           |            | Grey       |
| 57064    | 27                           |            | Grey       |
| 52677    | 28                           |            | Grey       |
| 52683    | 28                           |            | Grey       |
| 56194    | 29                           |            | Grey       |
| 60255    | 30                           |            | Grey       |
| 78178    | 31                           |            | Grey       |
| 78179    | 31                           |            | Grey       |
| 78217    | 32                           |            | Grey       |
| 78218    | 32                           |            | Grey       |
| 78198    | 33                           |            | Grey       |
| 61393    | 34                           |            | Grey       |
| 61396    | 34                           |            | Grey       |
| 69433    | 35                           |            | Grey       |
| 70699    | 36                           |            | Grey       |
| 51859    | 37                           |            | Grey       |
| 51866    | 37                           |            | Grey       |
| 52769    | 38                           |            | Grey       |
| 52780    | 38                           |            | Grey       |
| 64610    | 39                           |            | Grey       |
| 54117    | 40                           |            | Grey       |
| 54118    | 40                           |            | Grey       |
| 64622    | 41                           |            | Grey       |
| 64623    | 41                           |            | Grey       |
| 63677    | 42                           |            | Grey       |
| 77607    | 43                           |            | Grey       |
| 77608    | 43                           |            | Grey       |

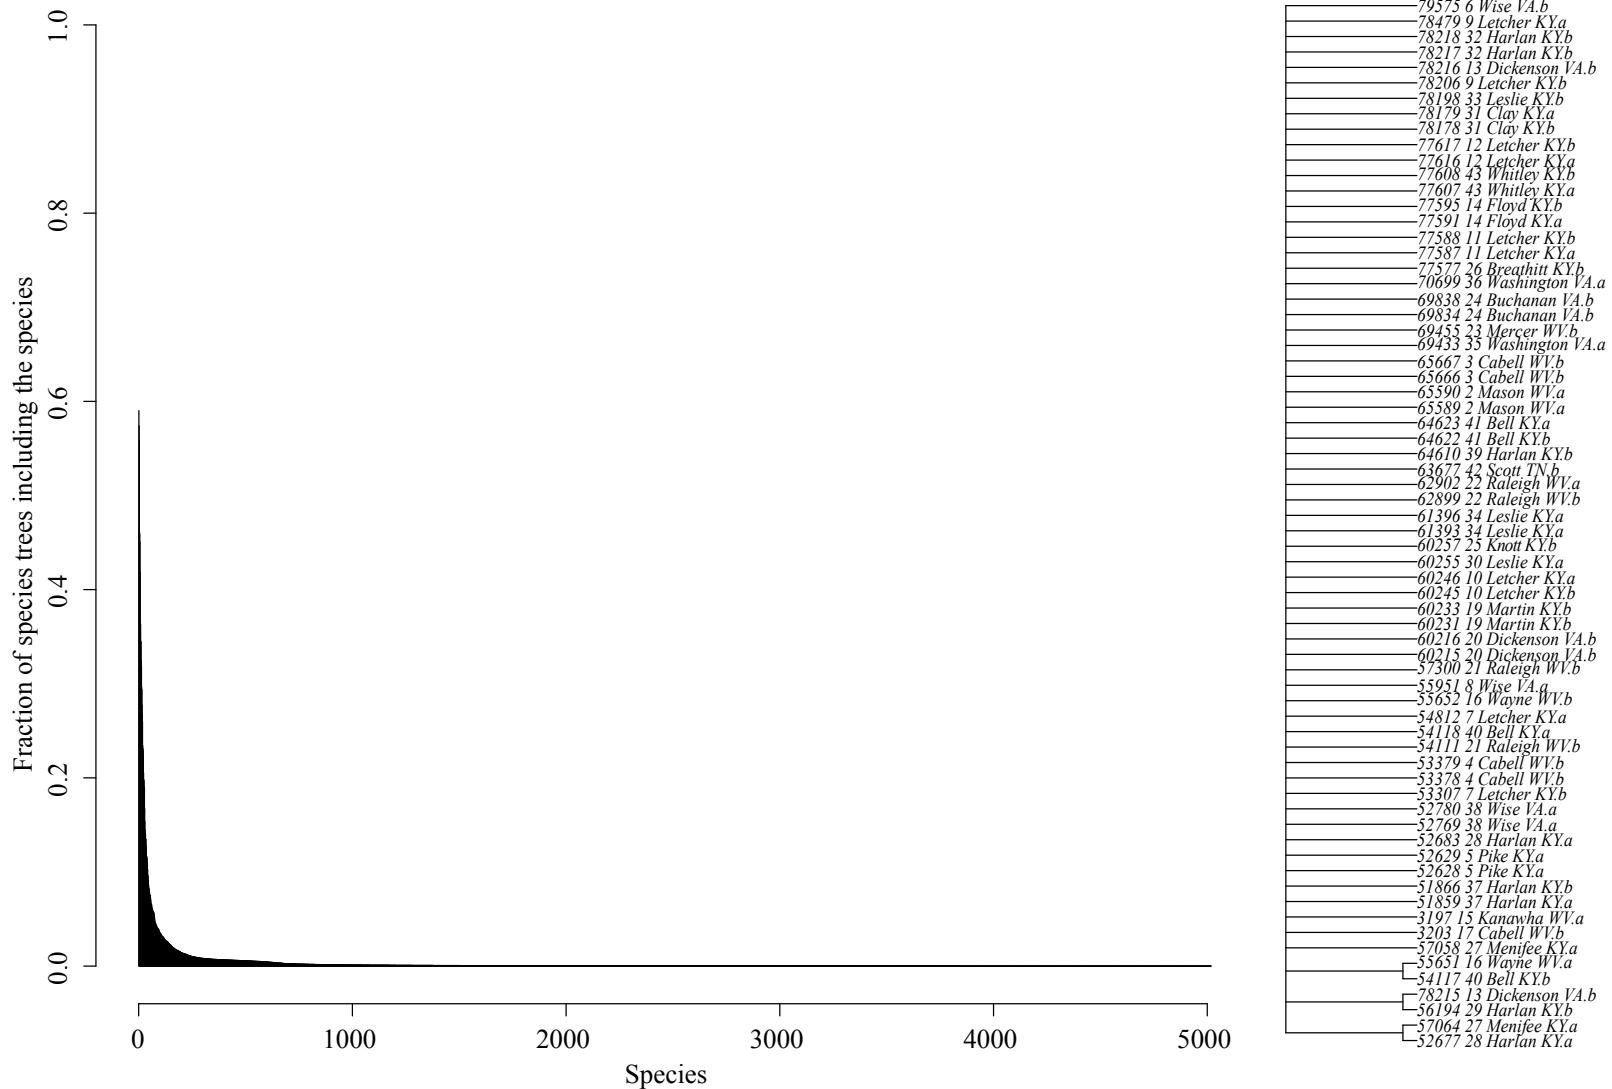

Fig. K. Summary of 500 replicate runs in Brownie, using data set 3 with mtDNA. 8556 unique species tree topologies were recovered, including 5018 delimited species. The graph shows that most of these species were recovered in a single tree. A majority rule consensus tree is provided in the right portion of the figure, showing the three species that were recovered in >50% of trees.



**Table G. Species delimited by Brownie using data set 4 with mtDNA.** The results of 500 independent runs are shown here. Grey boxes indicate inclusion in a delimited species. Two species were consistently delimited in this analysis

| Specimen   | Number | 500 | 500 |
|------------|--------|-----|-----|
| Population | Freq   | 1.0 | 1.0 |
| 65589      | 2      |     |     |
| 65590      | 2      |     |     |
| 65666      | 3      |     |     |
| 65667      | 3      |     |     |
| 53378      | 4      |     |     |
| 53379      | 4      |     |     |
| 52628      | 5      |     |     |
| 52629      | 5      |     |     |
| 79575      | 6      |     |     |
| 53307      | 7      |     |     |
| 54812      | 7      |     |     |
| 55951      | 8      |     |     |
| 78206      | 9      |     |     |
| 78479      | 9      |     |     |
| 60245      | 10     |     |     |
| 60246      | 10     |     |     |
| 77587      | 11     |     |     |
| 77588      | 11     |     |     |
| 77616      | 12     |     |     |
| 77617      | 12     |     |     |
| 78215      | 13     |     |     |
| 78216      | 13     |     |     |
| 77591      | 14     |     |     |
| 77595      | 14     |     |     |
| 3197       | 15     |     |     |
| 55651      | 16     |     |     |
| 55652      | 16     |     |     |
| 3203       | 17     |     |     |
| 60231      | 19     |     |     |
| 60233      | 19     |     |     |
| 60215      | 20     |     |     |
| 60216      | 20     |     |     |
| 54111      | 21     |     |     |
| 57300      | 21     |     |     |
| 62899      | 22     |     |     |
| 62902      | 22     |     |     |
| 69455      | 23     |     |     |
| 69834      | 24     |     |     |
| 69838      | 24     |     |     |
| 60257      | 25     |     |     |
| 77577      | 26     |     |     |
| 57058      | 27     |     |     |
| 57064      | 27     |     |     |
| 52677      | 28     |     |     |
| 52683      | 28     |     |     |
| 56194      | 29     |     |     |
| 60255      | 30     |     |     |
| 78178      | 31     |     |     |
| 78179      | 31     |     |     |
| 78217      | 32     |     |     |
| 78218      | 32     |     |     |
| 78198      | 33     |     |     |
| 61393      | 34     |     |     |
| 61396      | 34     |     |     |
| 69433      | 35     |     |     |
| 70699      | 36     |     |     |
| 51859      | 37     |     |     |
| 51866      | 37     |     |     |
| 52769      | 38     |     |     |
| 52780      | 38     |     |     |
| 64610      | 39     |     |     |
| 54117      | 40     |     |     |
| 54118      | 40     |     |     |
| 64622      | 41     |     |     |
| 64623      | 41     |     |     |
| 63677      | 42     |     |     |
| 77607      | 43     |     |     |
| 77608      | 43     |     |     |
