# Supplementary material for: Multilocus Phylogeography and Species Delimitation in the Cumberland Plateau Salamander, Plethodon kentucki: Incongruence among Data Sets and Methods
Source: PubMed Central journal article supplement (PMC4790894; doi:10.1371/journal.pone.0150022), 2016-03-14
Supplement: pone.0150022.s006.pdf [file pone.0150022.s006.pdf]

## **Appendix S6**

### **Genealogical sorting index results**

**Table 1. Genealogical sorting index results for putative species delimited using bGMYC and Geneland.**

Data sets are described in the text. *P* values are based on 10,000 permutations, and are denoted with asterisks. *egsi* = ensemble *gsi*, for nuclear loci only. MtDNA is only reported for the Geneland analyses.

| Delimitation      | Data set   | OTU        | BFI          | GAPD          | ILF3          | MLC2A         | RAG1          | <i>egsi</i>   | mtDNA |
|-------------------|------------|------------|--------------|---------------|---------------|---------------|---------------|---------------|-------|
| bGMYC: 2 species  | Data set 1 | A          | 0.07         | <b>0.45**</b> | <b>0.29*</b>  | 0.07          | 0.14          | <b>0.20**</b> |       |
|                   |            | B          | 0.15         | 0.23          | <b>0.29*</b>  | 0.17          | 0.18          | <b>0.20*</b>  |       |
|                   | Data set 2 | A          | 0.07         | <b>0.37**</b> | 0.14          | 0.07          | 0.00          | <b>0.13*</b>  |       |
|                   |            | B          | 0.23         | 0.18          | <b>0.27*</b>  | 0.24          | 0.26          | <b>0.24**</b> |       |
|                   | Data set 3 | A          | 0.00         | 0.21          | 0.07          | 0.07          | 0.21          | 0.11          |       |
|                   |            | B          | 0.11         | 0.20          | <b>0.29*</b>  | 0.13          | 0.21          | 0.19          |       |
|                   | Data set 4 | A          | 0.14         | <b>0.29*</b>  | 0.21          | 0.00          | 0.14          | <b>0.16**</b> |       |
|                   |            | B          | 0.17         | 0.24          | 0.21          | 0.21          | 0.23          | <b>0.21*</b>  |       |
|                   | Diploid    | A          | 0.14         | <b>0.33**</b> | 0.11          | 0.14          | 0.00          | <b>0.14**</b> |       |
|                   |            | B          | 0.23         | <b>0.26*</b>  | 0.23          | 0.21          | 0.20          | <b>0.23**</b> |       |
| bGMYC: 17 species | Data set 1 | A          | 0.14         | 0.24          | 0.16          | 0.21          | 0.19          | <b>0.19*</b>  |       |
|                   |            | B          | 0.09         | 0.19          | 0.14          | 0.11          | 0.14          | 0.13          |       |
|                   |            | C          | 0.10         | 0.16          | 0.19          | 0.10          | 0.15          | 0.14          |       |
|                   |            | D          | 0.15         | <b>0.36**</b> | 0.25          | 0.14          | 0.13          | <b>0.21*</b>  |       |
|                   |            | E          | 0.12         | <b>0.32*</b>  | 0.16          | 0.13          | 0.20          | 0.19          |       |
|                   |            | F          | 0.09         | 0.49          | 0.05          | 0.13          | 0.05          | 0.16          |       |
|                   |            | G          | 0.11         | <b>0.79**</b> | <b>0.36**</b> | 0.16          | <b>1.00**</b> | <b>0.48**</b> |       |
|                   |            | H          | 0.20         | <b>0.34**</b> | 0.18          | 0.17          | 0.11          | <b>0.20*</b>  |       |
|                   |            | I          | 0.15         | 0.13          | 0.10          | 0.11          | 0.10          | 0.12          |       |
|                   |            | J          | 0.09         | 0.07          | 0.06          | 0.24          | 0.10          | 0.11          |       |
|                   |            | K          | 0.06         | 0.09          | 0.10          | 0.05          | 0.08          | 0.07          |       |
|                   |            | L          | 0.11         | 0.05          | 0.08          | 0.09          | 0.09          | 0.08          |       |
|                   |            | M          | 0.05         | 0.24          | 0.06          | 0.11          | 0.49          | 0.19          |       |
|                   |            | N          | 0.06         | 0.06          | 0.06          | <b>1.00*</b>  | <b>1.00*</b>  | <b>0.44*</b>  |       |
|                   |            | O          | 0.49         | 0.06          | 0.11          | 1.00          | 0.09          | <b>0.35*</b>  |       |
|                   |            | Q          | <b>1.00*</b> | 0.11          | 0.10          | 0.07          | 0.10          | 0.28          |       |
|                   |            | Data set 2 | A            | 0.10          | 0.16          | 0.08          | 0.21          | 0.24          | 0.16  |
|                   | B          |            | 0.12         | 0.15          | 0.22          | 0.22          | 0.19          | 0.18          |       |
|                   | C          |            | 0.16         | 0.11          | 0.16          | 0.12          | 0.19          | 0.15          |       |
|                   | D          |            | 0.14         | 0.26          | 0.22          | <b>0.26*</b>  | <b>0.32*</b>  | <b>0.24**</b> |       |
|                   | E          |            | 0.20         | <b>0.30*</b>  | 0.21          | <b>0.28*</b>  | 0.21          | <b>0.24**</b> |       |
|                   | F          |            | 0.19         | 0.11          | 0.08          | 0.32          | 0.07          | 0.15          |       |
|                   | G          |            | 0.19         | <b>0.36*</b>  | 0.20          | <b>0.36*</b>  | <b>0.54**</b> | <b>0.33**</b> |       |
|                   | H          |            | 0.17         | <b>0.31*</b>  | <b>0.29*</b>  | 0.25          | 0.22          | <b>0.25**</b> |       |
|                   | I          |            | 1.00         | 1.00          | 0.11          | 0.49          | 0.15          | <b>0.55**</b> |       |
|                   | J          |            | <b>1.00*</b> | 0.13          | 0.11          | 0.49          | 0.24          | <b>0.39*</b>  |       |
|                   | K          |            | 0.06         | 0.10          | 0.09          | 0.19          | 0.15          | 0.12          |       |
|                   | L          |            | 0.15         | 0.07          | 0.08          | 0.09          | 0.07          | 0.09          |       |
|                   | M          |            | 0.06         | 0.15          | 0.19          | 0.11          | 0.13          | 0.13          |       |
|                   | N          | 0.08       | 0.09         | 0.15          | 0.24          | 0.32          | 0.18          |               |       |
| O                 | 0.07       | 0.04       | 0.06         | 0.10          | 0.07          | 0.07          |               |               |       |
| Q                 | 1.00       | 0.24       | 0.06         | 0.08          | 0.10          | 0.29          |               |               |       |
| Data set 3        | A          | 0.10       | <b>0.30*</b> | 0.08          | 0.16          | 0.21          | 0.17          |               |       |
|                   | B          | 0.09       | 0.19         | 0.09          | 0.19          | 0.15          | 0.14          |               |       |
|                   | C          | 0.09       | 0.13         | 0.15          | 0.08          | 0.20          | 0.13          |               |       |
|                   | D          | 0.15       | 0.23         | 0.18          | 0.16          | 0.21          | 0.19          |               |       |
|                   | E          | 0.13       | <b>0.30*</b> | 0.13          | 0.16          | 0.21          | 0.19          |               |       |
|                   | F          | 0.19       | 0.09         | 0.06          | 0.32          | 0.06          | 0.14          |               |       |
|                   | G          | 0.11       | <b>0.29*</b> | 0.24          | 0.16          | <b>0.54**</b> | <b>0.27**</b> |               |       |
|                   | H          | 0.17       | <b>0.31*</b> | 0.17          | 0.22          | 0.15          | <b>0.20*</b>  |               |       |
|                   | I          | 0.15       | 0.13         | 0.15          | 0.10          | 0.10          | 0.13          |               |       |
|                   | J          | 1.00       | 0.11         | 0.15          | 0.32          | 0.32          | <b>0.38*</b>  |               |       |
| K                 | 0.08       | 0.10       | 0.10         | 0.19          | 0.19          | 0.13          |               |               |       |

| Delimitation        | Data set           | OTU | BFI           | GAPD          | ILF3          | MLC2A         | RAG1          | egsi          | mtDNA |
|---------------------|--------------------|-----|---------------|---------------|---------------|---------------|---------------|---------------|-------|
|                     |                    | L   | 0.10          | 0.04          | 0.08          | 0.11          | 0.09          | 0.08          |       |
|                     |                    | M   | 0.06          | 0.24          | 0.07          | 0.15          | 0.49          | 0.20          |       |
|                     |                    | N   | 0.06          | 0.09          | 0.19          | 0.32          | 0.32          | 0.20          |       |
|                     |                    | O   | 0.08          | 0.10          | 0.32          | 0.06          | 0.24          | 0.16          |       |
|                     |                    | Q   | <b>1.00*</b>  | 0.24          | 0.05          | 0.09          | 0.09          | 0.29          |       |
|                     | Data set 4         | A   | 0.15          | 0.24          | 0.09          | 0.16          | 0.21          | 0.17          |       |
|                     |                    | B   | 0.17          | 0.15          | 0.12          | 0.17          | 0.17          | 0.15          |       |
|                     |                    | C   | 0.11          | 0.14          | 0.14          | 0.11          | 0.14          | 0.13          |       |
|                     |                    | D   | 0.20          | 0.21          | 0.15          | 0.30          | 0.18          | <b>0.21*</b>  |       |
|                     |                    | E   | 0.16          | <b>0.28*</b>  | 0.24          | 0.16          | 0.13          | <b>0.19*</b>  |       |
|                     |                    | F   | 0.19          | 0.11          | 0.06          | 0.32          | 0.07          | 0.15          |       |
|                     |                    | G   | 0.07          | <b>1.00**</b> | 0.22          | 0.14          | <b>0.65**</b> | <b>0.42**</b> |       |
|                     |                    | H   | 0.18          | <b>0.34**</b> | 0.18          | <b>0.27*</b>  | 0.20          | <b>0.23**</b> |       |
|                     |                    | I   | 0.11          | 0.13          | 0.24          | 0.09          | 0.07          | 0.13          |       |
|                     |                    | J   | 0.07          | 0.06          | 0.05          | 0.19          | 0.10          | 0.09          |       |
|                     |                    | K   | 0.06          | 0.10          | 0.09          | 0.15          | 0.24          | 0.13          |       |
|                     |                    | L   | 0.15          | 0.07          | 0.08          | 0.08          | 0.09          | 0.09          |       |
|                     |                    | M   | 0.05          | 0.15          | 0.06          | 0.11          | <b>1.00*</b>  | 0.27          |       |
|                     |                    | N   | 0.08          | 0.09          | 0.13          | <b>1.00*</b>  | 0.24          | <b>0.31*</b>  |       |
|                     |                    | O   | <b>1.00*</b>  | 0.07          | 0.15          | 1.00          | 0.09          | <b>0.46*</b>  |       |
|                     |                    | Q   | <b>1.00*</b>  | 0.32          | 0.08          | 0.09          | 0.11          | <b>0.32*</b>  |       |
|                     | Diploid            | A   | 0.14          | <b>0.25*</b>  | 0.14          | <b>0.25**</b> | <b>0.27**</b> | <b>0.21**</b> |       |
|                     |                    | B   | 0.15          | <b>0.24*</b>  | 0.18          | 0.17          | 0.16          | <b>0.18*</b>  |       |
|                     |                    | C   | 0.15          | 0.16          | 0.17          | 0.11          | 0.14          | 0.15          |       |
|                     |                    | D   | 0.19          | <b>0.31**</b> | 0.19          | <b>0.25**</b> | 0.23          | <b>0.24**</b> |       |
|                     |                    | E   | 0.17          | <b>0.34**</b> | 0.20          | <b>0.25**</b> | <b>0.28**</b> | <b>0.25**</b> |       |
|                     |                    | F   | 0.18          | 0.12          | 0.14          | 0.17          | 0.15          | <b>0.15*</b>  |       |
|                     |                    | G   | 0.13          | <b>0.44**</b> | <b>0.26**</b> | <b>0.22*</b>  | <b>0.73**</b> | <b>0.36**</b> |       |
|                     |                    | H   | 0.21          | <b>0.45**</b> | <b>0.24*</b>  | <b>0.25**</b> | 0.18          | <b>0.26**</b> |       |
|                     |                    | I   | <b>0.28**</b> | <b>0.28*</b>  | 0.17          | 0.12          | 0.15          | <b>0.20**</b> |       |
|                     |                    | J   | 0.15          | 0.13          | 0.09          | 0.11          | 0.09          | 0.11          |       |
|                     |                    | K   | 0.08          | 0.14          | 0.16          | 0.10          | 0.12          | 0.12          |       |
|                     |                    | L   | 0.17          | 0.08          | 0.20          | 0.17          | 0.11          | 0.15          |       |
|                     |                    | M   | 0.08          | <b>0.21*</b>  | 0.10          | 0.12          | <b>0.26*</b>  | <b>0.16*</b>  |       |
|                     |                    | N   | 0.12          | 0.11          | 0.13          | <b>0.42**</b> | 0.16          | <b>0.19**</b> |       |
|                     |                    | O   | 0.12          | 0.11          | 0.11          | 0.12          | 0.12          | 0.11          |       |
|                     |                    | Q   | <b>1.00**</b> | 0.10          | 0.09          | 0.10          | 0.10          | <b>0.28**</b> |       |
| Geneland: 3 species | mtDNA + Data set 1 | A   | 0.08          | <b>0.50**</b> | 0.12          | 0.12          | 0.20          | <b>0.20**</b> | 0.20  |
|                     |                    | B   | 0.12          | <b>0.36**</b> | 0.26          | <b>0.31*</b>  | 0.22          | <b>0.24**</b> | 0.17  |
|                     |                    | C   | 0.21          | <b>0.40**</b> | 0.18          | 0.24          | 0.13          | <b>0.22**</b> | 0.18  |
|                     | mtDNA + Data set 2 | A   | 0.16          | <b>0.55**</b> | 0.20          | 0.20          | <b>0.39**</b> | <b>0.29**</b> | 0.20  |
|                     |                    | B   | 0.22          | <b>0.38**</b> | <b>0.38**</b> | 0.24          | <b>0.66**</b> | <b>0.34**</b> | 0.17  |
|                     |                    | C   | 0.20          | <b>0.38**</b> | <b>0.29*</b>  | <b>0.44**</b> | <b>0.26**</b> | <b>0.29**</b> | 0.18  |
|                     | mtDNA + Data set 3 | A   | 0.16          | <b>0.50**</b> | 0.12          | 0.20          | <b>0.39**</b> | <b>0.26**</b> | 0.20  |
|                     |                    | B   | 0.19          | <b>0.34**</b> | <b>0.31*</b>  | <b>0.31*</b>  | <b>0.48**</b> | <b>0.30**</b> | 0.17  |
|                     |                    | C   | 0.18          | <b>0.27*</b>  | 0.20          | <b>0.29*</b>  | 0.18          | <b>0.22**</b> | 0.18  |
|                     | mtDNA + Data set 4 | A   | 0.08          | <b>0.50**</b> | 0.16          | 0.08          | <b>0.34**</b> | <b>0.23**</b> | 0.20  |
|                     |                    | B   | 0.12          | <b>0.28*</b>  | 0.22          | 0.22          | <b>0.28*</b>  | <b>0.21**</b> | 0.17  |
|                     |                    | C   | 0.20          | <b>0.37**</b> | 0.22          | <b>0.29*</b>  | 0.17          | <b>0.24**</b> | 0.18  |
|                     | Diploid            | A   | 0.14          | <b>0.58**</b> | 0.16          | 0.18          | <b>0.32**</b> | <b>0.28**</b> |       |
|                     |                    | B   | 0.19          | <b>0.37**</b> | <b>0.25*</b>  | <b>0.29**</b> | <b>0.33**</b> | <b>0.29**</b> |       |
|                     |                    | C   | 0.23          | <b>0.44**</b> | <b>0.24*</b>  | <b>0.32**</b> | <b>0.21*</b>  | <b>0.29**</b> |       |

\*  $P < 0.01$

\*\*  $P < 0.001$
